# Supplementary material
Source: publisher figshare collection journal article supplement (https://karger.figshare.com/articles/dataset/_/28787243)
Supplement: Supplementary file 1 [file 1]

Supplementary table 7:Global Age Structure of Leukemia Deaths Rate, 2021

| sex       | age              | val         | upper       | lower       |
|-----------|------------------|-------------|-------------|-------------|
| 1 Male    | <5 years         | 1.75960806  | 2.387318654 | 1.051678819 |
| 1 Female  | <5 years         | 1.318053906 | 1.669975624 | 0.936287439 |
| 2 Male    | 5-9 years        | 1.525399269 | 1.882040524 | 1.033797038 |
| 2 Female  | 5-9 years        | 1.060107992 | 1.217683891 | 0.792829138 |
| 3 Male    | 10-14 years      | 1.447517038 | 1.810094898 | 1.005394958 |
| 3 Female  | 10-14 years      | 1.169553332 | 1.31901317  | 0.910067626 |
| 4 Male    | 15-19 years      | 1.521728675 | 1.842878371 | 1.082010835 |
| 4 Female  | 15-19 years      | 1.251350951 | 1.43396366  | 0.937064001 |
| 5 Male    | 20-24 years      | 1.533114323 | 1.808975847 | 1.076812758 |
| 5 Female  | 20-24 years      | 1.229149142 | 1.38896562  | 0.906338743 |
| 6 Male    | 25-29 years      | 1.549919321 | 1.828790843 | 1.113161726 |
| 6 Female  | 25-29 years      | 1.178892569 | 1.349971383 | 0.925042691 |
| 7 Male    | 30-34 years      | 1.704556691 | 2.055689807 | 1.207832347 |
| 7 Female  | 30-34 years      | 1.288087618 | 1.448782563 | 1.014019366 |
| 8 Male    | 35-39 years      | 1.952845569 | 2.336026597 | 1.411477613 |
| 8 Female  | 35-39 years      | 1.514552915 | 1.726117299 | 1.153854846 |
| 9 Male    | 40-44 years      | 2.378407164 | 2.935276104 | 1.77664271  |
| 9 Female  | 40-44 years      | 1.872965849 | 2.112363966 | 1.481267561 |
| 10 Male   | 45-49 years      | 2.876522492 | 3.544979635 | 2.163448631 |
| 10 Female | 45-49 years      | 2.304422559 | 2.606816843 | 1.838678707 |
| 11 Male   | 50-54 years      | 3.933471352 | 4.736028565 | 2.897319866 |
| 11 Female | 50-54 years      | 3.076106103 | 3.556169595 | 2.396038748 |
| 12 Male   | 55-59 years      | 5.89364936  | 7.247146404 | 4.507696354 |
| 12 Female | 55-59 years      | 4.505816431 | 5.158370534 | 3.552891357 |
| 13 Male   | 60-64 years      | 9.059448797 | 10.75587599 | 7.154163833 |
| 13 Female | 60-64 years      | 6.304618278 | 7.031332677 | 5.096519953 |
| 14 Male   | 65-69 years      | 13.86299382 | 16.13802856 | 11.10679142 |
| 14 Female | 65-69 years      | 9.014367434 | 10.19570787 | 7.464497548 |
| 15 Male   | 70-74 years      | 21.5959964  | 24.97845807 | 17.94930297 |
| 15 Female | 70-74 years      | 13.30954444 | 14.56194432 | 11.45899606 |
| 16 Male   | 75-79 years      | 31.50859629 | 35.26441654 | 26.6935615  |
| 16 Female | 75-79 years      | 18.23386934 | 20.01675566 | 15.70314202 |
| 17 Male   | 80-84 years      | 45.40686009 | 51.21940989 | 38.96788205 |
| 17 Female | 80-84 years      | 25.25642757 | 28.00516586 | 20.720561   |
| 18 Male   | 85-89 years      | 67.88021969 | 76.7255047  | 57.99985729 |
| 18 Female | 85-89 years      | 34.71305706 | 39.48718023 | 27.25442749 |
| 19 Male   | 90-94 years      | 93.77889759 | 104.1557517 | 78.00315032 |
| 19 Female | 90-94 years      | 49.74361612 | 56.92739657 | 37.4620358  |
| 20 Male   | 95+ years        | 96.4419478  | 109.2193649 | 74.36528612 |
| 20 Female | 95+ years        | 63.5437849  | 73.6414345  | 45.66862132 |
| 21 Male   | All ages         | 4.586118442 | 5.377405578 | 3.707697542 |
| 21 Female | All ages         | 3.527532898 | 3.885670109 | 2.946476584 |
| 22 Male   | Age-standardized | 4.787195448 | 5.585299298 | 3.908596599 |
| 22 Female | Age-standardized | 3.170980689 | 3.494108562 | 2.636138681 |
