# Supplementary material
Source: publisher figshare collection journal article supplement (https://karger.figshare.com/articles/dataset/_/28787243)
Supplement: Supplementary file 2 [file 1]

Supplementary table 5:Global Age Structure of Leukemia Prevalence  
Rate, 2021

| sex       | age              | val         | upper       | lower       |
|-----------|------------------|-------------|-------------|-------------|
| 1 Male    | <5 years         | 32.99551139 | 48.86800526 | 19.7137209  |
| 1 Female  | <5 years         | 25.7567811  | 36.35563842 | 15.85991126 |
| 2 Male    | 5-9 years        | 11.22469498 | 14.2882657  | 7.793886583 |
| 2 Female  | 5-9 years        | 7.942376162 | 9.452503115 | 5.804468915 |
| 3 Male    | 10-14 years      | 7.918094748 | 9.627825506 | 5.811219074 |
| 3 Female  | 10-14 years      | 6.434002572 | 7.287200051 | 4.95440366  |
| 4 Male    | 15-19 years      | 6.33058037  | 7.766026694 | 4.547971946 |
| 4 Female  | 15-19 years      | 4.805893698 | 5.506613999 | 3.518364038 |
| 5 Male    | 20-24 years      | 6.94801775  | 8.544642343 | 4.751694126 |
| 5 Female  | 20-24 years      | 4.838367488 | 5.72977031  | 3.433814977 |
| 6 Male    | 25-29 years      | 8.357419974 | 10.18082735 | 5.649418793 |
| 6 Female  | 25-29 years      | 5.957127943 | 6.991395021 | 4.337766093 |
| 7 Male    | 30-34 years      | 9.019814342 | 11.21634159 | 6.09276761  |
| 7 Female  | 30-34 years      | 6.535666205 | 7.708804437 | 4.916115253 |
| 8 Male    | 35-39 years      | 10.74353281 | 13.02552175 | 7.292091444 |
| 8 Female  | 35-39 years      | 7.902944291 | 9.485247051 | 5.781407717 |
| 9 Male    | 40-44 years      | 12.97769741 | 17.17260322 | 9.100720131 |
| 9 Female  | 40-44 years      | 9.619688452 | 11.56371675 | 7.016724092 |
| 10 Male   | 45-49 years      | 17.89411964 | 23.17585408 | 12.55506954 |
| 10 Female | 45-49 years      | 12.91735853 | 15.50994873 | 9.595566725 |
| 11 Male   | 50-54 years      | 28.10910088 | 35.00791119 | 19.88923032 |
| 11 Female | 50-54 years      | 20.1105817  | 24.297469   | 13.96956704 |
| 12 Male   | 55-59 years      | 41.39050331 | 52.3690131  | 30.73301144 |
| 12 Female | 55-59 years      | 28.40716016 | 34.36812267 | 20.83631714 |
| 13 Male   | 60-64 years      | 57.93206328 | 68.57439841 | 45.55605247 |
| 13 Female | 60-64 years      | 37.83419345 | 44.37083192 | 29.34272142 |
| 14 Male   | 65-69 years      | 76.61757576 | 88.52893304 | 62.03454912 |
| 14 Female | 65-69 years      | 50.14577836 | 56.97465279 | 40.12977511 |
| 15 Male   | 70-74 years      | 109.737559  | 126.1738139 | 93.42092652 |
| 15 Female | 70-74 years      | 69.4534912  | 77.13662598 | 58.60752793 |
| 16 Male   | 75-79 years      | 144.4299094 | 158.3566496 | 124.6725468 |
| 16 Female | 75-79 years      | 88.17829765 | 97.09636757 | 73.95481631 |
| 17 Male   | 80-84 years      | 132.0201942 | 144.746996  | 114.8038687 |
| 17 Female | 80-84 years      | 78.50610711 | 88.65230812 | 62.53193664 |
| 18 Male   | 85-89 years      | 143.356361  | 157.2291649 | 123.1317287 |
| 18 Female | 85-89 years      | 87.70457065 | 101.7235614 | 67.62819627 |
| 19 Male   | 90-94 years      | 167.798027  | 184.9811389 | 138.264929  |
| 19 Female | 90-94 years      | 113.0716439 | 130.6161433 | 84.49312374 |
| 20 Male   | 95+ years        | 60.02777761 | 68.28835453 | 45.72369396 |
| 20 Female | 95+ years        | 39.63948688 | 46.28648666 | 28.13034079 |
| 21 Male   | All ages         | 24.9708828  | 28.87973903 | 19.53586272 |
| 21 Female | All ages         | 18.49497892 | 20.84196664 | 14.88743948 |
| 22 Male   | Age-standardized | 25.20566386 | 29.29742178 | 19.77984841 |
| 22 Female | Age-standardized | 17.31571595 | 19.47533028 | 13.73763084 |
