# Supplementary material
Source: publisher figshare collection journal article supplement (https://karger.figshare.com/articles/dataset/_/28787243)
Supplement: Supplementary file 3 [file 1]

Supplementary table 10:Temporal Joinpoint Analysis of Leukemia Age-Standardized Incidence Rates, 1990-2021

| sex       | Start | End  | val     | lower   | upper   | P. Value | measure |
|-----------|-------|------|---------|---------|---------|----------|---------|
| 1 Both    | 1990  | 2021 | -0.6623 | -0.7499 | -0.5746 |          | 0 AAPC  |
| 2 Female  | 1990  | 2021 | -0.8329 | -0.9111 | -0.7546 |          | 0 AAPC  |
| 3 Male    | 1990  | 2021 | -0.5515 | -0.6286 | -0.4744 |          | 0 AAPC  |
| 4 Both    | 1990  | 1996 | 0.1427  | 0.0295  | 0.2561  | 0.016312 | APC     |
| 5 Both    | 1996  | 2011 | -0.6385 | -0.6701 | -0.6069 |          | 0 APC   |
| 6 Both    | 2011  | 2015 | -1.0753 | -1.4279 | -0.7215 | 5.00E-06 | APC     |
| 7 Both    | 2015  | 2019 | -0.6308 | -1.0367 | -0.2233 | 0.004462 | APC     |
| 8 Both    | 2019  | 2021 | -2.4642 | -3.3316 | -1.589  | 1.50E-05 | APC     |
| 9 Female  | 1990  | 1997 | -0.0164 | -0.1567 | 0.1242  | 0.811958 | APC     |
| 10 Female | 1997  | 2019 | -0.9195 | -0.9444 | -0.8945 |          | 0 APC   |
| 11 Female | 2019  | 2021 | -2.708  | -3.8283 | -1.5747 | 5.50E-05 | APC     |
| 12 Male   | 1990  | 1996 | 0.226   | 0.1371  | 0.3149  | 7.10E-05 | APC     |
| 13 Male   | 1996  | 2003 | -0.5875 | -0.674  | -0.501  |          | 0 APC   |
| 14 Male   | 2003  | 2010 | -0.356  | -0.4424 | -0.2695 |          | 0 APC   |
| 15 Male   | 2010  | 2016 | -0.9826 | -1.1081 | -0.857  |          | 0 APC   |
| 16 Male   | 2016  | 2019 | -0.4832 | -1.1084 | 0.146   | 0.122196 | APC     |
| 17 Male   | 2019  | 2021 | -2.2248 | -2.8505 | -1.595  | 2.00E-06 | APC     |
