# Supplementary material
Source: publisher figshare collection journal article supplement (https://karger.figshare.com/articles/dataset/_/28787243)
Supplement: Supplementary file 4 [file 1]

Supplementary table 2:Age-Standardised Incidence rates of Leukemia for Both sex  
by Country, 2021

|    | location              | val  | upper | lower | Rate_2021 |             |
|----|-----------------------|------|-------|-------|-----------|-------------|
| 1  | Philippines           | 4.36 | 5.24  | 3.68  | 4.36      | (3.68–5.24) |
| 2  | China                 | 7.21 | 9.05  | 4.93  | 7.21      | (4.93–9.05) |
|    | Micronesia            |      |       |       |           |             |
| 3  | (Federated States of) | 4.36 | 5.97  | 2.98  | 4.36      | (2.98–5.97) |
| 4  | Azerbaijan            | 4.03 | 5.72  | 2.82  | 4.03      | (2.82–5.72) |
| 5  | Thailand              | 6.07 | 7.92  | 3.73  | 6.07      | (3.73–7.92) |
| 6  | Samoa                 | 5.16 | 7.03  | 3.89  | 5.16      | (3.89–7.03) |
| 7  | Indonesia             | 4.76 | 6.21  | 3.86  | 4.76      | (3.86–6.21) |
| 8  | Viet Nam              | 2.91 | 3.9   | 2.19  | 2.91      | (2.19–3.9)  |
| 9  | Malaysia              | 5.07 | 6.56  | 4.25  | 5.07      | (4.25–6.56) |
| 10 | Tonga                 | 3.01 | 4.03  | 2.15  | 3.01      | (2.15–4.03) |
| 11 | Myanmar               | 4.99 | 6.5   | 3.82  | 4.99      | (3.82–6.5)  |
| 12 | Fiji                  | 4.95 | 6.78  | 2.76  | 4.95      | (2.76–6.78) |
| 13 | Marshall Islands      | 4.13 | 5.7   | 2.75  | 4.13      | (2.75–5.7)  |
|    | Taiwan                |      |       |       |           |             |
| 14 | (Province of China)   | 5.15 | 5.64  | 4.67  | 5.15      | (4.67–5.64) |
|    | Democratic            |      |       |       |           |             |
| 15 | People's Republic of  | 4.89 | 6.8   | 3.5   | 4.89      | (3.5–6.8)   |
|    | Korea                 |      |       |       |           |             |
| 16 | Armenia               | 4.93 | 5.54  | 4.37  | 4.93      | (4.37–5.54) |
| 17 | Sri Lanka             | 3.65 | 5.12  | 2.46  | 3.65      | (2.46–5.12) |
| 18 | Uzbekistan            | 3.31 | 4     | 2.73  | 3.31      | (2.73–4)    |
| 19 | Timor-Leste           | 4.42 | 5.79  | 3.3   | 4.42      | (3.3–5.79)  |
| 20 | Cambodia              | 5.97 | 7.77  | 4.45  | 5.97      | (4.45–7.77) |
| 21 | Kazakhstan            | 3.39 | 3.87  | 2.98  | 3.39      | (2.98–3.87) |
| 22 | Solomon Islands       | 4.15 | 5.65  | 2.61  | 4.15      | (2.61–5.65) |
| 23 | Papua New Guinea      | 3.17 | 4.87  | 1.77  | 3.17      | (1.77–4.87) |
| 24 | Georgia               | 5.56 | 6.2   | 5.01  | 5.56      | (5.01–6.2)  |
| 25 | Albania               | 4.32 | 6.35  | 3.04  | 4.32      | (3.04–6.35) |
| 26 | Belarus               | 8.09 | 9.79  | 6.63  | 8.09      | (6.63–9.79) |
| 27 | Maldives              | 2.92 | 3.78  | 2.09  | 2.92      | (2.09–3.78) |
|    | Lao People's          |      |       |       |           |             |
| 28 | Democratic Republic   | 5.09 | 6.69  | 3.73  | 5.09      | (3.73–6.69) |
| 29 | Kiribati              | 3.07 | 4.15  | 1.83  | 3.07      | (1.83–4.15) |

|    |                           |       |       |       |                        |
|----|---------------------------|-------|-------|-------|------------------------|
| 30 | Vanuatu                   | 3.51  | 4.55  | 2.32  | 3.51 (2.32–4.55)       |
| 31 | Turkmenistan              | 3.19  | 3.99  | 2.56  | 3.19 (2.56–3.99)       |
| 32 | Hungary                   | 8.28  | 9.92  | 6.94  | 8.28 (6.94–9.92)       |
| 33 | Latvia                    | 7.99  | 9.4   | 6.76  | 7.99 (6.76–9.4)        |
| 34 | Slovakia                  | 7.45  | 9.48  | 5.39  | 7.45 (5.39–9.48)       |
| 35 | Bulgaria                  | 5.81  | 6.98  | 4.72  | 5.81 (4.72–6.98)       |
| 36 | Brunei<br>Darussalam      | 4.81  | 5.79  | 3.46  | 4.81 (3.46–5.79)       |
| 37 | Estonia                   | 8.85  | 10.19 | 7.45  | 8.85<br>(7.45–10.19)   |
| 38 | Tajikistan                | 2.74  | 4.04  | 1.82  | 2.74 (1.82–4.04)       |
| 39 | Montenegro                | 6.88  | 9.23  | 5.2   | 6.88 (5.2–9.23)        |
| 40 | Romania                   | 5.76  | 6.52  | 4.95  | 5.76 (4.95–6.52)       |
| 41 | Czechia                   | 8.92  | 10.4  | 7.54  | 8.92 (7.54–10.4)       |
| 42 | Republic of<br>Moldova    | 3.71  | 4.25  | 3.27  | 3.71 (3.27–4.25)       |
| 43 | Lithuania                 | 7.89  | 8.93  | 6.74  | 7.89 (6.74–8.93)       |
| 44 | Ukraine                   | 5.3   | 6.84  | 4     | 5.3 (4–6.84)           |
| 45 | Republic of<br>Korea      | 4.76  | 6.15  | 2.9   | 4.76 (2.9–6.15)        |
| 46 | Poland                    | 7.64  | 8.37  | 6.95  | 7.64 (6.95–8.37)       |
| 47 | Kyrgyzstan                | 2.9   | 3.41  | 2.39  | 2.9 (2.39–3.41)        |
| 48 | Bosnia and<br>Herzegovina | 5.2   | 6.69  | 3.76  | 5.2 (3.76–6.69)        |
| 49 | Mongolia                  | 2.65  | 3.34  | 1.98  | 2.65 (1.98–3.34)       |
| 50 | Japan                     | 5.69  | 6.02  | 5.28  | 5.69 (5.28–6.02)       |
| 51 | Slovenia                  | 11.06 | 13.1  | 9.24  | 11.06<br>(9.24–13.1)   |
| 52 | North<br>Macedonia        | 6.17  | 7.96  | 4.55  | 6.17 (4.55–7.96)       |
| 53 | Russian<br>Federation     | 5.98  | 6.42  | 5.57  | 5.98 (5.57–6.42)       |
| 54 | Singapore                 | 5.07  | 5.56  | 4.6   | 5.07 (4.6–5.56)        |
| 55 | Croatia                   | 9.39  | 11.15 | 7.95  | 9.39<br>(7.95–11.15)   |
| 56 | Serbia                    | 6.53  | 8.15  | 4.92  | 6.53 (4.92–8.15)       |
| 57 | Australia                 | 10.72 | 11.73 | 9.79  | 10.72<br>(9.79–11.73)  |
| 58 | Ireland                   | 7.88  | 8.7   | 7.18  | 7.88 (7.18–8.7)        |
| 59 | Italy                     | 10.99 | 11.83 | 10.17 | 10.99<br>(10.17–11.83) |
| 60 | Sweden                    | 8.26  | 9.2   | 7.35  | 8.26 (7.35–9.2)        |
| 61 | Portugal                  | 8.05  | 8.94  | 7.17  | 8.05 (7.17–8.94)       |
| 62 | Finland                   | 7.75  | 8.45  | 7.07  | 7.75 (7.07–8.45)       |

|    |                        |       |       |       |                       |
|----|------------------------|-------|-------|-------|-----------------------|
| 63 | Germany                | 9.68  | 10.51 | 8.88  | 9.68<br>(8.88–10.51)  |
| 64 | Spain                  | 9.29  | 10.23 | 8.3   | 9.29 (8.3–10.23)      |
| 65 | Malta                  | 7.93  | 9.06  | 6.81  | 7.93 (6.81–9.06)      |
| 66 | Andorra                | 10.98 | 15.56 | 7.33  | 10.98<br>(7.33–15.56) |
| 67 | Iceland                | 8.82  | 9.85  | 7.83  | 8.82 (7.83–9.85)      |
| 68 | Greece                 | 11.53 | 12.3  | 10.66 | 11.53<br>(10.66–12.3) |
| 69 | Israel                 | 9.84  | 10.77 | 8.89  | 9.84<br>(8.89–10.77)  |
| 70 | Netherlands            | 7.89  | 8.58  | 7.14  | 7.89 (7.14–8.58)      |
| 71 | New Zealand            | 9.98  | 10.72 | 9.19  | 9.98<br>(9.19–10.72)  |
| 72 | Norway                 | 8.13  | 8.7   | 7.46  | 8.13 (7.46–8.7)       |
| 73 | Belgium                | 9.67  | 10.77 | 8.55  | 9.67<br>(8.55–10.77)  |
| 74 | Austria                | 9.3   | 10.2  | 8.22  | 9.3 (8.22–10.2)       |
| 75 | Cyprus                 | 10.45 | 12.96 | 7.02  | 10.45<br>(7.02–12.96) |
| 76 | Denmark                | 10.97 | 11.96 | 9.87  | 10.97<br>(9.87–11.96) |
| 77 | France                 | 10.35 | 11.5  | 9.21  | 10.35<br>(9.21–11.5)  |
| 78 | Switzerland            | 10.28 | 11.46 | 9.05  | 10.28<br>(9.05–11.46) |
| 79 | Luxembourg             | 10.19 | 11.48 | 9.14  | 10.19<br>(9.14–11.48) |
| 80 | Argentina              | 5.18  | 5.61  | 4.79  | 5.18 (4.79–5.61)      |
| 81 | United Kingdom         | 8.78  | 9.14  | 8.3   | 8.78 (8.3–9.14)       |
| 82 | Canada                 | 9.76  | 10.55 | 8.97  | 9.76<br>(8.97–10.55)  |
| 83 | Jamaica                | 4.16  | 5.4   | 3.24  | 4.16 (3.24–5.4)       |
| 84 | Belize                 | 3.31  | 3.71  | 2.93  | 3.31 (2.93–3.71)      |
| 85 | Haiti                  | 5.89  | 8.38  | 3.82  | 5.89 (3.82–8.38)      |
| 86 | Chile                  | 4.85  | 5.26  | 4.45  | 4.85 (4.45–5.26)      |
| 87 | Dominican<br>Republic  | 3.46  | 4.52  | 2.59  | 3.46 (2.59–4.52)      |
| 88 | Antigua and<br>Barbuda | 4.47  | 4.76  | 4.17  | 4.47 (4.17–4.76)      |
| 89 | Bahamas                | 4.06  | 4.96  | 3.26  | 4.06 (3.26–4.96)      |
| 90 | Guyana                 | 3.46  | 4.45  | 2.68  | 3.46 (2.68–4.45)      |
| 91 | Barbados               | 5.6   | 7.02  | 4.43  | 5.6 (4.43–7.02)       |

|     |                                        |      |       |      |                      |
|-----|----------------------------------------|------|-------|------|----------------------|
| 92  | Grenada                                | 5.27 | 5.9   | 4.6  | 5.27 (4.6–5.9)       |
| 93  | Dominica                               | 6.21 | 7.87  | 4.62 | 6.21 (4.62–7.87)     |
| 94  | Cuba                                   | 5.29 | 6.1   | 4.58 | 5.29 (4.58–6.1)      |
| 95  | Bolivia<br>(Plurinational<br>State of) | 6.61 | 8.82  | 4.61 | 6.61 (4.61–8.82)     |
| 96  | United States<br>of America            | 9.81 | 10.22 | 9.11 | 9.81<br>(9.11–10.22) |
| 97  | Saint Lucia<br>Saint Vincent           | 4.09 | 4.98  | 3.38 | 4.09 (3.38–4.98)     |
| 98  | and the<br>Grenadines                  | 4.91 | 5.62  | 4.3  | 4.91 (4.3–5.62)      |
| 99  | Uruguay                                | 7.37 | 7.98  | 6.76 | 7.37 (6.76–7.98)     |
| 100 | Colombia                               | 5.35 | 6.36  | 4.48 | 5.35 (4.48–6.36)     |
| 101 | Suriname                               | 3.58 | 4.61  | 2.68 | 3.58 (2.68–4.61)     |
| 102 | Ecuador                                | 5.8  | 7.03  | 4.75 | 5.8 (4.75–7.03)      |
| 103 | Costa Rica                             | 7.46 | 8.3   | 6.64 | 7.46 (6.64–8.3)      |
| 104 | Peru                                   | 5.56 | 7.28  | 3.52 | 5.56 (3.52–7.28)     |
| 105 | Trinidad and<br>Tobago                 | 4.37 | 5.53  | 3.38 | 4.37 (3.38–5.53)     |
| 106 | Honduras                               | 4.98 | 6.68  | 3.6  | 4.98 (3.6–6.68)      |
| 107 | Algeria                                | 2.94 | 3.81  | 2.12 | 2.94 (2.12–3.81)     |
| 108 | Brazil                                 | 4.28 | 4.49  | 4.05 | 4.28 (4.05–4.49)     |
| 109 | El Salvador                            | 5.74 | 7.14  | 4.12 | 5.74 (4.12–7.14)     |
| 110 | Guatemala<br>Venezuela                 | 4.33 | 5.03  | 3.75 | 4.33 (3.75–5.03)     |
| 111 | (Bolivarian<br>Republic of)            | 4.89 | 6.4   | 3.64 | 4.89 (3.64–6.4)      |
| 112 | Panama                                 | 5.56 | 6.69  | 4.6  | 5.56 (4.6–6.69)      |
| 113 | Mexico                                 | 5.17 | 5.68  | 4.66 | 5.17 (4.66–5.68)     |
| 114 | Nicaragua                              | 3.79 | 4.62  | 2.76 | 3.79 (2.76–4.62)     |
| 115 | Paraguay                               | 5.27 | 6.8   | 3.86 | 5.27 (3.86–6.8)      |
| 116 | Afghanistan                            | 9.95 | 14.56 | 5.88 | 9.95<br>(5.88–14.56) |
| 117 | Bahrain                                | 5.64 | 7.3   | 4.1  | 5.64 (4.1–7.3)       |
| 118 | Lebanon                                | 6.96 | 9     | 5.13 | 6.96 (5.13–9)        |
| 119 | Jordan                                 | 6.45 | 8.34  | 4.61 | 6.45 (4.61–8.34)     |
| 120 | Syrian Arab<br>Republic                | 7.84 | 10.58 | 5.6  | 7.84 (5.6–10.58)     |
| 121 | Morocco                                | 1.24 | 1.58  | 0.85 | 1.24 (0.85–1.58)     |
| 122 | Kuwait                                 | 4.51 | 5.39  | 3.68 | 4.51 (3.68–5.39)     |
| 123 | Nepal                                  | 2.94 | 4     | 2.18 | 2.94 (2.18–4)        |
| 124 | Yemen                                  | 5.94 | 8.67  | 3.21 | 5.94 (3.21–8.67)     |
| 125 | Egypt                                  | 7.22 | 9.06  | 5.07 | 7.22 (5.07–9.06)     |

|     |                                                   |      |       |      |                      |
|-----|---------------------------------------------------|------|-------|------|----------------------|
| 126 | Palestine                                         | 7.13 | 9     | 5.74 | 7.13 (5.74-9)        |
| 127 | Tunisia                                           | 3.56 | 4.88  | 2.4  | 3.56 (2.4-4.88)      |
| 128 | India                                             | 2.71 | 3.28  | 2.18 | 2.71 (2.18-3.28)     |
| 129 | Türkiye                                           | 7.28 | 8.99  | 5.5  | 7.28 (5.5-8.99)      |
| 130 | Iraq                                              | 7.28 | 9.31  | 5.46 | 7.28 (5.46-9.31)     |
| 131 | Saudi Arabia                                      | 4.81 | 7.31  | 3.55 | 4.81 (3.55-7.31)     |
| 132 | Qatar                                             | 6.17 | 8.34  | 4.06 | 6.17 (4.06-8.34)     |
| 133 | Libya                                             | 7.9  | 10.54 | 5.65 | 7.9 (5.65-10.54)     |
| 134 | Bhutan                                            | 2.97 | 4.48  | 1.98 | 2.97 (1.98-4.48)     |
| 135 | United Arab<br>Emirates                           | 6.52 | 8.54  | 4.88 | 6.52 (4.88-8.54)     |
| 136 | Bangladesh                                        | 2.85 | 3.89  | 1.99 | 2.85 (1.99-3.89)     |
| 137 | Oman                                              | 3.93 | 5.12  | 2.89 | 3.93 (2.89-5.12)     |
| 138 | Iran (Islamic<br>Republic of)                     | 6.77 | 8.18  | 4.16 | 6.77 (4.16-8.18)     |
| 139 | Congo                                             | 2.26 | 3.18  | 1.45 | 2.26 (1.45-3.18)     |
| 140 | Pakistan                                          | 3.65 | 4.87  | 2.8  | 3.65 (2.8-4.87)      |
| 141 | Angola                                            | 2.09 | 3.17  | 1.23 | 2.09 (1.23-3.17)     |
| 142 | Comoros                                           | 2.75 | 3.86  | 1.89 | 2.75 (1.89-3.86)     |
| 143 | Burundi                                           | 2.51 | 3.75  | 1.5  | 2.51 (1.5-3.75)      |
| 144 | Equatorial<br>Guinea                              | 2.14 | 3.5   | 1.14 | 2.14 (1.14-3.5)      |
| 145 | Djibouti                                          | 2.72 | 4.25  | 1.6  | 2.72 (1.6-4.25)      |
| 146 | Democratic<br>Republic of the<br>Congo<br>Central | 1.97 | 3     | 1.17 | 1.97 (1.17-3)        |
| 147 | African<br>Republic                               | 2.33 | 3.16  | 1.49 | 2.33 (1.49-3.16)     |
| 148 | Gabon                                             | 2.29 | 3.33  | 1.41 | 2.29 (1.41-3.33)     |
| 149 | Botswana                                          | 2.97 | 4.21  | 2.04 | 2.97 (2.04-4.21)     |
| 150 | Eritrea                                           | 2.88 | 3.89  | 1.85 | 2.88 (1.85-3.89)     |
| 151 | Ethiopia                                          | 7.09 | 10.99 | 5.01 | 7.09<br>(5.01-10.99) |
| 152 | Kenya                                             | 2.16 | 2.88  | 1.59 | 2.16 (1.59-2.88)     |
| 153 | Seychelles                                        | 5.45 | 6.61  | 4.36 | 5.45 (4.36-6.61)     |
| 154 | Rwanda                                            | 2.7  | 3.99  | 1.73 | 2.7 (1.73-3.99)      |
| 155 | Mozambique                                        | 3.81 | 5.2   | 2.74 | 3.81 (2.74-5.2)      |
| 156 | Malawi                                            | 0.82 | 1.21  | 0.5  | 0.82 (0.5-1.21)      |
| 157 | Somalia                                           | 2.91 | 4.06  | 1.93 | 2.91 (1.93-4.06)     |
| 158 | Madagascar                                        | 2.11 | 2.91  | 1.37 | 2.11 (1.37-2.91)     |
| 159 | Namibia                                           | 2.39 | 3.29  | 1.71 | 2.39 (1.71-3.29)     |
| 160 | Zambia                                            | 2.8  | 3.79  | 1.82 | 2.8 (1.82-3.79)      |
| 161 | Mauritius                                         | 3.71 | 3.92  | 3.46 | 3.71 (3.46-3.92)     |

|     |                          |       |       |       |                        |
|-----|--------------------------|-------|-------|-------|------------------------|
|     | United                   |       |       |       |                        |
| 162 | Republic of<br>Tanzania  | 2.67  | 3.84  | 1.72  | 2.67 (1.72–3.84)       |
| 163 | Zimbabwe                 | 4.26  | 5.54  | 3.14  | 4.26 (3.14–5.54)       |
| 164 | Lesotho                  | 4.35  | 5.78  | 3.19  | 4.35 (3.19–5.78)       |
| 165 | Uganda                   | 1.99  | 2.76  | 1.28  | 1.99 (1.28–2.76)       |
| 166 | South Africa             | 3.71  | 4.28  | 2.57  | 3.71 (2.57–4.28)       |
| 167 | Burkina Faso             | 1.4   | 1.91  | 0.68  | 1.4 (0.68–1.91)        |
| 168 | Benin                    | 1.34  | 1.88  | 0.67  | 1.34 (0.67–1.88)       |
| 169 | Cameroon                 | 1.47  | 2.18  | 0.73  | 1.47 (0.73–2.18)       |
| 170 | Cabo Verde               | 3.45  | 4.39  | 2.55  | 3.45 (2.55–4.39)       |
| 171 | Eswatini                 | 4.06  | 6.01  | 2.76  | 4.06 (2.76–6.01)       |
| 172 | Chad                     | 1.4   | 1.98  | 0.74  | 1.4 (0.74–1.98)        |
| 173 | Ghana                    | 1.43  | 2.08  | 1.04  | 1.43 (1.04–2.08)       |
| 174 | Guinea-Bissau            | 1.63  | 2.21  | 0.92  | 1.63 (0.92–2.21)       |
| 175 | Gambia                   | 0.61  | 0.79  | 0.42  | 0.61 (0.42–0.79)       |
| 176 | Guinea                   | 0.42  | 0.64  | 0.25  | 0.42 (0.25–0.64)       |
| 177 | Côte d'Ivoire            | 0.86  | 1.23  | 0.51  | 0.86 (0.51–1.23)       |
| 178 | Mali                     | 0.83  | 1.14  | 0.54  | 0.83 (0.54–1.14)       |
| 179 | Niger                    | 1.23  | 1.96  | 0.58  | 1.23 (0.58–1.96)       |
| 180 | Sao Tome and<br>Principe | 0.75  | 1.03  | 0.55  | 0.75 (0.55–1.03)       |
| 181 | Togo                     | 1.4   | 1.97  | 0.69  | 1.4 (0.69–1.97)        |
| 182 | Liberia                  | 1.4   | 1.99  | 0.66  | 1.4 (0.66–1.99)        |
| 183 | Bermuda                  | 5.5   | 6.77  | 4.5   | 5.5 (4.5–6.77)         |
| 184 | Sierra Leone             | 1.33  | 1.87  | 0.64  | 1.33 (0.64–1.87)       |
| 185 | Mauritania               | 1.31  | 1.84  | 0.68  | 1.31 (0.68–1.84)       |
| 186 | Guam                     | 3.15  | 3.83  | 2.47  | 3.15 (2.47–3.83)       |
| 187 | Senegal                  | 1.38  | 2.02  | 0.72  | 1.38 (0.72–2.02)       |
| 188 | American Samoa           | 3.82  | 4.76  | 2.89  | 3.82 (2.89–4.76)       |
| 189 | Cook Islands             | 1.34  | 1.75  | 0.95  | 1.34 (0.95–1.75)       |
| 190 | Greenland                | 2.86  | 3.79  | 2.12  | 2.86 (2.12–3.79)       |
| 191 | Nigeria                  | 1.1   | 1.46  | 0.63  | 1.1 (0.63–1.46)        |
| 192 | Puerto Rico              | 5.93  | 6.91  | 4.92  | 5.93 (4.92–6.91)       |
| 193 | Monaco                   | 25.09 | 32.83 | 18.21 | 25.09<br>(18.21–32.83) |
| 194 | Niue                     | 5.71  | 7.06  | 4.22  | 5.71 (4.22–7.06)       |
| 195 | San Marino               | 13.01 | 18.52 | 8.21  | 13.01<br>(8.21–18.52)  |
| 196 | Tuvalu                   | 3.81  | 4.82  | 2.57  | 3.81 (2.57–4.82)       |
| 197 | Palau                    | 2.57  | 3.16  | 1.94  | 2.57 (1.94–3.16)       |
| 198 | Nauru                    | 5.2   | 7.45  | 3.43  | 5.2 (3.43–7.45)        |
| 199 | Saint Kitts and          | 4.02  | 4.72  | 3.37  | 4.02 (3.37–4.72)       |

# Nevis

|     |                                 |            |       |             |                  |
|-----|---------------------------------|------------|-------|-------------|------------------|
| 200 | Tokelau                         | 6.26       | 9.04  | 3.87        | 6.26 (3.87–9.04) |
| 201 | United States<br>Virgin Islands | 3.58       | 4.72  | 2.57        | 3.58 (2.57–4.72) |
| 202 | Northern<br>Mariana<br>Islands  | 3.83       | 4.49  | 2.89        | 3.83 (2.89–4.49) |
| 203 | South Sudan                     | 3.15       | 4.34  | 2.07        | 3.15 (2.07–4.34) |
| 204 | Sudan                           | 6.22       | 8.91  | 3.85        | 6.22 (3.85–8.91) |
|     | The average<br>ASIR             | 5.16504902 | 6.405 | 4.034901961 | 5.17 (4.03–6.41) |
