# Supplementary material
Source: publisher figshare collection journal article supplement (https://karger.figshare.com/articles/dataset/_/28787243)
Supplement: Supplementary file 5 [file 1]

Supplementary table 3:Age-Standardised Deaths rates of Leukemia for Both sex  
by Country, 2021

|    | location   | val  | upper | lower | Rate_2021        |
|----|------------|------|-------|-------|------------------|
| 1  | Slovenia   | 4.27 | 4.93  | 3.59  | 4.27 (3.59-4.93) |
| 2  | Malta      | 3.86 | 4.34  | 3.4   | 3.86 (3.4-4.34)  |
| 3  | Cameroon   | 1.41 | 2.06  | 0.72  | 1.41 (0.72-2.06) |
| 4  | Somalia    | 2.94 | 4.11  | 1.99  | 2.94 (1.99-4.11) |
| 5  | Bahrain    | 5.02 | 6.54  | 3.67  | 5.02 (3.67-6.54) |
| 6  | Tajikistan | 2.48 | 3.59  | 1.67  | 2.48 (1.67-3.59) |
| 7  | Bolivia    | 6.46 | 8.62  | 4.46  | 6.46 (4.46-8.62) |
| 8  | Gabon      | 2.14 | 3.09  | 1.32  | 2.14 (1.32-3.09) |
| 9  | Congo      | 2.19 | 3.09  | 1.41  | 2.19 (1.41-3.09) |
| 10 | Kiribati   | 3.15 | 4.24  | 1.86  | 3.15 (1.86-4.24) |
| 11 | Tunisia    | 2.64 | 3.61  | 1.86  | 2.64 (1.86-3.61) |
| 12 | Lithuania  | 5.09 | 5.71  | 4.42  | 5.09 (4.42-5.71) |
| 13 | Syria      | 6.31 | 8.61  | 4.64  | 6.31 (4.64-8.61) |
| 14 | Andorra    | 4.5  | 6.2   | 2.95  | 4.5 (2.95-6.2)   |
| 15 | Sweden     | 3.7  | 4.13  | 3.26  | 3.7 (3.26-4.13)  |
| 16 | Seychelles | 4.71 | 5.72  | 3.77  | 4.71 (3.77-5.72) |

|    |                  |      |      |      |      |             |
|----|------------------|------|------|------|------|-------------|
| 17 | The Gambia       | 0.58 | 0.75 | 0.4  | 0.58 | (0.4–0.75)  |
| 18 | Belarus          | 4.41 | 5.31 | 3.64 | 4.41 | (3.64–5.31) |
| 19 | Estonia          | 4.51 | 5.14 | 3.85 | 4.51 | (3.85–5.14) |
| 20 | Uganda           | 1.87 | 2.56 | 1.23 | 1.87 | (1.23–2.56) |
| 21 | Taiwan           | 3.28 | 3.53 | 3.01 | 3.28 | (3.01–3.53) |
| 22 | Uzbekistan       | 2.83 | 3.44 | 2.34 | 2.83 | (2.34–3.44) |
| 23 | Botswana         | 2.88 | 4.09 | 1.99 | 2.88 | (1.99–4.09) |
| 24 | The Bahamas      | 3.4  | 4.16 | 2.76 | 3.4  | (2.76–4.16) |
| 25 | Cape Verde       | 2.89 | 3.68 | 2.19 | 2.89 | (2.19–3.68) |
| 26 | Ghana            | 1.34 | 1.93 | 0.96 | 1.34 | (0.96–1.93) |
| 27 | Turkmenistan     | 2.78 | 3.51 | 2.21 | 2.78 | (2.21–3.51) |
| 28 | Jordan           | 5.24 | 6.88 | 3.83 | 5.24 | (3.83–6.88) |
| 29 | Barbados         | 4.84 | 5.93 | 3.8  | 4.84 | (3.8–5.93)  |
| 30 | Costa Rica       | 5.59 | 6.17 | 4.98 | 5.59 | (4.98–6.17) |
| 31 | Algeria          | 2.57 | 3.35 | 1.85 | 2.57 | (1.85–3.35) |
| 32 | Papua New Guinea | 3.22 | 5.03 | 1.8  | 3.22 | (1.8–5.03)  |

|    |                             |      |       |      |      |              |
|----|-----------------------------|------|-------|------|------|--------------|
| 33 | Turkey                      | 5.45 | 6.73  | 4.12 | 5.45 | (4.12–6.73)  |
| 34 | Netherlands                 | 3.96 | 4.29  | 3.58 | 3.96 | (3.58–4.29)  |
| 35 | Kuwait                      | 2.64 | 3.11  | 2.16 | 2.64 | (2.16–3.11)  |
| 36 | Spain                       | 3.87 | 4.23  | 3.45 | 3.87 | (3.45–4.23)  |
| 37 | Djibouti                    | 2.6  | 4     | 1.58 | 2.6  | (1.58–4)     |
| 38 | Latvia                      | 4.57 | 5.25  | 3.92 | 4.57 | (3.92–5.25)  |
| 39 | Northern<br>Mariana Islands | 3.56 | 4.21  | 2.72 | 3.56 | (2.72–4.21)  |
| 40 | Monaco                      | 9.78 | 12.12 | 7.29 | 9.78 | (7.29–12.12) |
| 41 | Bosnia and<br>Herzegovina   | 3.52 | 4.46  | 2.59 | 3.52 | (2.59–4.46)  |
| 42 | Iran                        | 5.06 | 5.85  | 3.3  | 5.06 | (3.3–5.85)   |
| 43 | Burundi                     | 2.5  | 3.72  | 1.51 | 2.5  | (1.51–3.72)  |
| 44 | Eritrea                     | 2.83 | 3.81  | 1.83 | 2.83 | (1.83–3.81)  |
| 45 | Tanzania                    | 2.51 | 3.57  | 1.64 | 2.51 | (1.64–3.57)  |
| 46 | Yemen                       | 5.78 | 8.37  | 3.21 | 5.78 | (3.21–8.37)  |
| 47 | Marshall<br>Islands         | 4.19 | 5.76  | 2.78 | 4.19 | (2.78–5.76)  |
| 48 | Dominica                    | 5.77 | 7.21  | 4.37 | 5.77 | (4.37–7.21)  |

|    |                       |      |      |      |      |             |
|----|-----------------------|------|------|------|------|-------------|
| 49 | Austria               | 4.37 | 4.75 | 3.93 | 4.37 | (3.93–4.75) |
| 50 | Norway                | 4.02 | 4.27 | 3.65 | 4.02 | (3.65–4.27) |
| 51 | Cambodia              | 5.89 | 7.62 | 4.43 | 5.89 | (4.43–7.62) |
| 52 | Samoa                 | 5.11 | 6.86 | 3.82 | 5.11 | (3.82–6.86) |
| 53 | Chile                 | 3.45 | 3.69 | 3.17 | 3.45 | (3.17–3.69) |
| 54 | Swaziland             | 3.98 | 5.86 | 2.69 | 3.98 | (2.69–5.86) |
| 55 | Mexico                | 4.54 | 4.98 | 4.1  | 4.54 | (4.1–4.98)  |
| 56 | Malaysia              | 4.57 | 6.14 | 3.82 | 4.57 | (3.82–6.14) |
| 57 | Dominican<br>Republic | 3.18 | 4.26 | 2.41 | 3.18 | (2.41–4.26) |
| 58 | Ecuador               | 5.27 | 6.43 | 4.32 | 5.27 | (4.32–6.43) |
| 59 | Iraq                  | 5.8  | 7.51 | 4.41 | 5.8  | (4.41–7.51) |
| 60 | Zambia                | 2.64 | 3.59 | 1.74 | 2.64 | (1.74–3.59) |
| 61 | Bulgaria              | 4.67 | 5.62 | 3.82 | 4.67 | (3.82–5.62) |
| 62 | Mali                  | 0.8  | 1.11 | 0.53 | 0.8  | (0.53–1.11) |
| 63 | Moldova               | 2.77 | 3.12 | 2.49 | 2.77 | (2.49–3.12) |
| 64 | Palau                 | 2.32 | 2.87 | 1.78 | 2.32 | (1.78–2.87) |

|    |                       |      |      |      |      |             |
|----|-----------------------|------|------|------|------|-------------|
| 65 | Bermuda               | 3.34 | 4.02 | 2.81 | 3.34 | (2.81–4.02) |
| 66 | Nicaragua             | 3.26 | 3.98 | 2.38 | 3.26 | (2.38–3.98) |
| 67 | Palestine             | 5.66 | 7.22 | 4.58 | 5.66 | (4.58–7.22) |
| 68 | Albania               | 2.99 | 4.33 | 2.12 | 2.99 | (2.12–4.33) |
| 69 | Singapore             | 2.52 | 2.71 | 2.32 | 2.52 | (2.32–2.71) |
| 70 | Russian<br>Federation | 3.69 | 3.96 | 3.44 | 3.69 | (3.44–3.96) |
| 71 | India                 | 2.63 | 3.21 | 2.14 | 2.63 | (2.14–3.21) |
| 72 | Argentina             | 4.46 | 4.8  | 4.14 | 4.46 | (4.14–4.8)  |
| 73 | United States         | 5.17 | 5.41 | 4.69 | 5.17 | (4.69–5.41) |
| 74 | Malawi                | 0.78 | 1.13 | 0.49 | 0.78 | (0.49–1.13) |
| 75 | Namibia               | 2.26 | 3.07 | 1.63 | 2.26 | (1.63–3.07) |
| 76 | Hungary               | 4.86 | 5.8  | 4.11 | 4.86 | (4.11–5.8)  |
| 77 | Brazil                | 3.87 | 4.04 | 3.63 | 3.87 | (3.63–4.04) |
| 78 | Belize                | 2.86 | 3.19 | 2.53 | 2.86 | (2.53–3.19) |
| 79 | Senegal               | 1.32 | 1.92 | 0.69 | 1.32 | (0.69–1.92) |
| 80 | Ukraine               | 3.53 | 4.51 | 2.66 | 3.53 | (2.66–4.51) |

|    |                 |      |       |      |                   |
|----|-----------------|------|-------|------|-------------------|
| 81 | Puerto Rico     | 4.16 | 4.87  | 3.42 | 4.16 (3.42-4.87)  |
| 82 | Egypt           | 6.4  | 8.13  | 4.68 | 6.4 (4.68-8.13)   |
| 83 | Switzerland     | 3.8  | 4.25  | 3.37 | 3.8 (3.37-4.25)   |
| 84 | Guinea          | 0.41 | 0.62  | 0.25 | 0.41 (0.25-0.62)  |
| 85 | Thailand        | 4.93 | 6.45  | 2.9  | 4.93 (2.9-6.45)   |
| 86 | Solomon Islands | 4.2  | 5.71  | 2.64 | 4.2 (2.64-5.71)   |
| 87 | Tokelau         | 5.73 | 8.09  | 3.62 | 5.73 (3.62-8.09)  |
| 88 | Bhutan          | 2.87 | 4.29  | 1.93 | 2.87 (1.93-4.29)  |
| 89 | Niue            | 5.21 | 6.34  | 3.82 | 5.21 (3.82-6.34)  |
| 90 | Maldives        | 2.44 | 3.15  | 1.78 | 2.44 (1.78-3.15)  |
| 91 | Lesotho         | 4.35 | 5.82  | 3.19 | 4.35 (3.19-5.82)  |
| 92 | Afghanistan     | 9.98 | 14.58 | 5.97 | 9.98 (5.97-14.58) |
| 93 | Finland         | 3.41 | 3.68  | 3.08 | 3.41 (3.08-3.68)  |
| 94 | Croatia         | 4.74 | 5.63  | 3.96 | 4.74 (3.96-5.63)  |
| 95 | Jamaica         | 3.65 | 4.65  | 2.84 | 3.65 (2.84-4.65)  |
| 96 | Libya           | 6.57 | 8.62  | 4.8  | 6.57 (4.8-8.62)   |

|     |                |      |      |      |      |             |
|-----|----------------|------|------|------|------|-------------|
| 97  | Grenada        | 4.49 | 5.02 | 3.94 | 4.49 | (3.94–5.02) |
| 98  | Kyrgyzstan     | 2.4  | 2.84 | 1.98 | 2.4  | (1.98–2.84) |
| 99  | Angola         | 2.06 | 3.18 | 1.21 | 2.06 | (1.21–3.18) |
| 100 | Macedonia      | 4.33 | 5.42 | 3.18 | 4.33 | (3.18–5.42) |
| 101 | South Sudan    | 3.04 | 4.16 | 2    | 3.04 | (2–4.16)    |
| 102 | Tonga          | 2.98 | 3.92 | 2.11 | 2.98 | (2.11–3.92) |
| 103 | France         | 4.93 | 5.44 | 4.4  | 4.93 | (4.4–5.44)  |
| 104 | Kenya          | 2.11 | 2.83 | 1.56 | 2.11 | (1.56–2.83) |
| 105 | Czech Republic | 5.11 | 5.88 | 4.37 | 5.11 | (4.37–5.88) |
| 106 | Canada         | 4.43 | 4.78 | 4.01 | 4.43 | (4.01–4.78) |
| 107 | South Africa   | 3.39 | 3.92 | 2.42 | 3.39 | (2.42–3.92) |
| 108 | El Salvador    | 4.92 | 6.08 | 3.51 | 4.92 | (3.51–6.08) |
| 109 | Brunei         | 4.23 | 5.12 | 3.11 | 4.23 | (3.11–5.12) |
| 110 | Georgia        | 4.56 | 5.07 | 4.11 | 4.56 | (4.11–5.07) |
| 111 | Tuvalu         | 3.81 | 4.79 | 2.55 | 3.81 | (2.55–4.79) |
| 112 | South Korea    | 2.41 | 2.94 | 1.53 | 2.41 | (1.53–2.94) |

|     |               |      |      |      |      |             |
|-----|---------------|------|------|------|------|-------------|
| 113 | Japan         | 3.06 | 3.21 | 2.79 | 3.06 | (2.79–3.21) |
| 114 | Mauritania    | 1.19 | 1.68 | 0.62 | 1.19 | (0.62–1.68) |
| 115 | Morocco       | 1.15 | 1.46 | 0.81 | 1.15 | (0.81–1.46) |
| 116 | Sudan         | 5.78 | 8.22 | 3.57 | 5.78 | (3.57–8.22) |
| 117 | Ethiopia      | 6.81 | 10.5 | 4.8  | 6.81 | (4.8–10.5)  |
| 118 | Timor-Leste   | 4.43 | 5.84 | 3.29 | 4.43 | (3.29–5.84) |
| 119 | Montenegro    | 4.04 | 5.18 | 3.14 | 4.04 | (3.14–5.18) |
| 120 | Cote d'Ivoire | 0.83 | 1.17 | 0.48 | 0.83 | (0.48–1.17) |
| 121 | Benin         | 1.3  | 1.82 | 0.65 | 1.3  | (0.65–1.82) |
| 122 | Niger         | 1.23 | 1.95 | 0.59 | 1.23 | (0.59–1.95) |
| 123 | Zimbabwe      | 4.22 | 5.48 | 3.13 | 4.22 | (3.13–5.48) |
| 124 | Uruguay       | 5.57 | 6.02 | 5.12 | 5.57 | (5.12–6.02) |
| 125 | Saint Lucia   | 3.49 | 4.19 | 2.88 | 3.49 | (2.88–4.19) |
| 126 | Kazakhstan    | 2.73 | 3.08 | 2.42 | 2.73 | (2.42–3.08) |
| 127 | Nepal         | 2.91 | 3.97 | 2.16 | 2.91 | (2.16–3.97) |
| 128 | Armenia       | 3.58 | 4.06 | 3.16 | 3.58 | (3.16–4.06) |



|     |              |      |      |      |      |             |
|-----|--------------|------|------|------|------|-------------|
| 129 | Serbia       | 4.2  | 5.15 | 3.16 | 4.2  | (3.16–5.15) |
| 130 | Israel       | 5.24 | 5.71 | 4.68 | 5.24 | (4.68–5.71) |
| 131 | San Marino   | 4.48 | 6.28 | 2.94 | 4.48 | (2.94–6.28) |
| 132 | Guyana       | 3.28 | 4.13 | 2.52 | 3.28 | (2.52–4.13) |
| 133 | Poland       | 4.72 | 5.13 | 4.3  | 4.72 | (4.3–5.13)  |
| 134 | Saudi Arabia | 3.61 | 5.29 | 2.72 | 3.61 | (2.72–5.29) |
| 135 | Mozambique   | 3.75 | 5.09 | 2.73 | 3.75 | (2.73–5.09) |
| 136 | Pakistan     | 3.61 | 4.83 | 2.78 | 3.61 | (2.78–4.83) |
| 137 | Panama       | 4.4  | 5.23 | 3.6  | 4.4  | (3.6–5.23)  |
| 138 | Romania      | 4.05 | 4.56 | 3.52 | 4.05 | (3.52–4.56) |
| 139 | Sierra Leone | 1.28 | 1.83 | 0.63 | 1.28 | (0.63–1.83) |
| 140 | Rwanda       | 2.58 | 3.8  | 1.69 | 2.58 | (1.69–3.8)  |
| 141 | Cook Islands | 1.15 | 1.46 | 0.81 | 1.15 | (0.81–1.46) |
| 142 | Australia    | 4.88 | 5.3  | 4.41 | 4.88 | (4.41–5.3)  |
| 143 | Burkina Faso | 1.38 | 1.88 | 0.67 | 1.38 | (0.67–1.88) |
| 144 | Mauritius    | 3.22 | 3.38 | 2.99 | 3.22 | (2.99–3.38) |

|     |                                        |      |      |      |      |             |
|-----|----------------------------------------|------|------|------|------|-------------|
| 145 | Ireland                                | 3.46 | 3.79 | 3.09 | 3.46 | (3.09–3.79) |
| 146 | Lebanon                                | 5.02 | 6.29 | 3.88 | 5.02 | (3.88–6.29) |
| 147 | Slovakia                               | 4.4  | 5.64 | 3.15 | 4.4  | (3.15–5.64) |
| 148 | Saint Vincent<br>and the<br>Grenadines | 4.36 | 4.95 | 3.83 | 4.36 | (3.83–4.95) |
| 149 | Liberia                                | 1.33 | 1.9  | 0.63 | 1.33 | (0.63–1.9)  |
| 150 | Central African<br>Republic            | 2.38 | 3.25 | 1.5  | 2.38 | (1.5–3.25)  |
| 151 | Chad                                   | 1.4  | 1.96 | 0.75 | 1.4  | (0.75–1.96) |
| 152 | Paraguay                               | 4.64 | 5.94 | 3.43 | 4.64 | (3.43–5.94) |
| 153 | North Korea                            | 4.07 | 5.65 | 2.94 | 4.07 | (2.94–5.65) |
| 154 | New Zealand                            | 4.37 | 4.65 | 3.97 | 4.37 | (3.97–4.65) |
| 155 | Antigua and<br>Barbuda                 | 3.82 | 4.05 | 3.58 | 3.82 | (3.58–4.05) |
| 156 | Democratic<br>Republic of the<br>Congo | 1.96 | 3.04 | 1.16 | 1.96 | (1.16–3.04) |
| 157 | Mongolia                               | 2.44 | 3.07 | 1.83 | 2.44 | (1.83–3.07) |
| 158 | Suriname                               | 3.31 | 4.29 | 2.46 | 3.31 | (2.46–4.29) |
| 159 | Equatorial<br>Guinea                   | 1.95 | 3.2  | 1.07 | 1.95 | (1.07–3.2)  |

|     |                                      |      |      |      |      |             |
|-----|--------------------------------------|------|------|------|------|-------------|
| 160 | Sao Tome and<br>Principe             | 0.68 | 0.9  | 0.5  | 0.68 | (0.5–0.9)   |
| 161 | Cuba                                 | 3.77 | 4.28 | 3.28 | 3.77 | (3.28–4.28) |
| 162 | Guinea-Bissau                        | 1.62 | 2.18 | 0.91 | 1.62 | (0.91–2.18) |
| 163 | Oman                                 | 3.04 | 3.86 | 2.3  | 3.04 | (2.3–3.86)  |
| 164 | Laos                                 | 5.09 | 6.71 | 3.7  | 5.09 | (3.7–6.71)  |
| 165 | Belgium                              | 4.94 | 5.42 | 4.35 | 4.94 | (4.35–5.42) |
| 166 | Comoros                              | 2.63 | 3.66 | 1.81 | 2.63 | (1.81–3.66) |
| 167 | Qatar                                | 4.06 | 5.48 | 2.84 | 4.06 | (2.84–5.48) |
| 168 | Cyprus                               | 5.07 | 6.32 | 3.61 | 5.07 | (3.61–6.32) |
| 169 | Nigeria                              | 1.07 | 1.4  | 0.64 | 1.07 | (0.64–1.4)  |
| 170 | Haiti                                | 5.93 | 8.4  | 3.93 | 5.93 | (3.93–8.4)  |
| 171 | Portugal                             | 4.06 | 4.41 | 3.63 | 4.06 | (3.63–4.41) |
| 172 | Peru                                 | 4.49 | 5.95 | 2.87 | 4.49 | (2.87–5.95) |
| 173 | Indonesia                            | 4.65 | 6.14 | 3.78 | 4.65 | (3.78–6.14) |
| 174 | Federated<br>States of<br>Micronesia | 4.39 | 5.97 | 2.99 | 4.39 | (2.99–5.97) |
| 175 | United Arab<br>Emirates              | 5.65 | 7.38 | 4.26 | 5.65 | (4.26–7.38) |

|     |                        |      |      |      |      |             |
|-----|------------------------|------|------|------|------|-------------|
| 176 | Sri Lanka              | 3.11 | 4.29 | 2.09 | 3.11 | (2.09–4.29) |
| 177 | Madagascar             | 2.05 | 2.84 | 1.32 | 2.05 | (1.32–2.84) |
| 178 | Germany                | 4.71 | 5.07 | 4.25 | 4.71 | (4.25–5.07) |
| 179 | Togo                   | 1.34 | 1.89 | 0.66 | 1.34 | (0.66–1.89) |
| 180 | Denmark                | 5.29 | 5.75 | 4.78 | 5.29 | (4.78–5.75) |
| 181 | Colombia               | 4.27 | 5.04 | 3.6  | 4.27 | (3.6–5.04)  |
| 182 | Trinidad and<br>Tobago | 3.91 | 4.92 | 3.03 | 3.91 | (3.03–4.92) |
| 183 | Bangladesh             | 2.72 | 3.7  | 1.87 | 2.72 | (1.87–3.7)  |
| 184 | Fiji                   | 5.08 | 6.97 | 2.82 | 5.08 | (2.82–6.97) |
| 185 | Vanuatu                | 3.59 | 4.68 | 2.38 | 3.59 | (2.38–4.68) |
| 186 | Guatemala              | 4.09 | 4.7  | 3.56 | 4.09 | (3.56–4.7)  |
| 187 | Italy                  | 4.76 | 5.08 | 4.3  | 4.76 | (4.3–5.08)  |
| 188 | Azerbaijan             | 3.32 | 4.86 | 2.36 | 3.32 | (2.36–4.86) |
| 189 | Venezuela              | 4.26 | 5.54 | 3.18 | 4.26 | (3.18–5.54) |
| 190 | Nauru                  | 5.16 | 7.38 | 3.45 | 5.16 | (3.45–7.38) |
| 191 | American Samoa         | 3.63 | 4.48 | 2.75 | 3.63 | (2.75–4.48) |

|     |                       |             |             |            |      |             |
|-----|-----------------------|-------------|-------------|------------|------|-------------|
| 192 | Saint Kitts and Nevis | 3.49        | 4.02        | 2.96       | 3.49 | (2.96–4.02) |
| 193 | Virgin Islands, U. S. | 2.61        | 3.41        | 1.89       | 2.61 | (1.89–3.41) |
| 194 | China                 | 3.42        | 4.26        | 2.51       | 3.42 | (2.51–4.26) |
| 195 | Greece                | 6.25        | 6.65        | 5.77       | 6.25 | (5.77–6.65) |
| 196 | Honduras              | 4.9         | 6.49        | 3.59       | 4.9  | (3.59–6.49) |
| 197 | Myanmar               | 4.87        | 6.42        | 3.72       | 4.87 | (3.72–6.42) |
| 198 | United Kingdom        | 4.33        | 4.51        | 3.99       | 4.33 | (3.99–4.51) |
| 199 | Greenland             | 2.49        | 3.3         | 1.88       | 2.49 | (1.88–3.3)  |
| 200 | Guam                  | 2.65        | 3.18        | 2.05       | 2.65 | (2.05–3.18) |
| 201 | Iceland               | 3.93        | 4.36        | 3.46       | 3.93 | (3.46–4.36) |
| 202 | Philippines           | 4.19        | 5.04        | 3.53       | 4.19 | (3.53–5.04) |
| 203 | Luxembourg            | 5.31        | 5.9         | 4.75       | 5.31 | (4.75–5.9)  |
| 204 | Vietnam               | 2.56        | 3.53        | 1.95       | 2.56 | (1.95–3.53) |
|     | The average ASMR      | 3.729460784 | 4.677745098 | 2.86504902 | 3.73 | (2.87–4.68) |

---
