# Supplementary material
Source: publisher figshare collection journal article supplement (https://karger.figshare.com/articles/dataset/_/28787243)
Supplement: Supplementary file 6 [file 1]

Supplementary table 8:Global Age Structure of Leukemia DALYs Rate, 2021

| sex       | age              | val         | upper       | lower       |
|-----------|------------------|-------------|-------------|-------------|
| 1 Male    | <5 years         | 157.5598095 | 212.8269101 | 94.04796748 |
| 1 Female  | <5 years         | 118.1486848 | 149.7429318 | 83.79486521 |
| 2 Male    | 5-9 years        | 127.4239256 | 156.8329025 | 86.42977667 |
| 2 Female  | 5-9 years        | 88.64459889 | 101.6411408 | 66.32760421 |
| 3 Male    | 10-14 years      | 113.0417741 | 141.1879215 | 78.49773296 |
| 3 Female  | 10-14 years      | 91.34101955 | 102.9457901 | 71.00399885 |
| 4 Male    | 15-19 years      | 111.0625543 | 134.4912349 | 78.97230904 |
| 4 Female  | 15-19 years      | 91.37118499 | 104.6577414 | 68.39267709 |
| 5 Male    | 20-24 years      | 104.5451181 | 123.4136197 | 73.40881541 |
| 5 Female  | 20-24 years      | 83.73561104 | 94.53611127 | 61.71469772 |
| 6 Male    | 25-29 years      | 98.07689012 | 115.7374366 | 70.45805529 |
| 6 Female  | 25-29 years      | 74.53955283 | 85.26882623 | 58.43204065 |
| 7 Male    | 30-34 years      | 99.36046564 | 119.8300448 | 70.53523543 |
| 7 Female  | 30-34 years      | 75.06245979 | 84.38165339 | 59.04081114 |
| 8 Male    | 35-39 years      | 104.3668228 | 125.053417  | 75.39107167 |
| 8 Female  | 35-39 years      | 80.83011066 | 92.05826337 | 61.54146666 |
| 9 Male    | 40-44 years      | 115.3860383 | 142.4150362 | 86.22867797 |
| 9 Female  | 40-44 years      | 90.72786491 | 102.3508134 | 71.64974176 |
| 10 Male   | 45-49 years      | 125.5860986 | 154.4303341 | 94.40822508 |
| 10 Female | 45-49 years      | 100.4334706 | 113.4376423 | 80.19464018 |
| 11 Male   | 50-54 years      | 153.5635416 | 185.8105613 | 113.3298538 |
| 11 Female | 50-54 years      | 119.7698718 | 138.021245  | 93.35201014 |
| 12 Male   | 55-59 years      | 202.690203  | 249.4544251 | 155.1204079 |
| 12 Female | 55-59 years      | 154.2892505 | 176.7338464 | 121.445407  |
| 13 Male   | 60-64 years      | 269.3757942 | 319.2638306 | 213.0855834 |
| 13 Female | 60-64 years      | 186.6239597 | 207.5572646 | 150.4497181 |
| 14 Male   | 65-69 years      | 348.4764464 | 407.2254558 | 279.156166  |
| 14 Female | 65-69 years      | 225.806697  | 255.3348083 | 187.0315006 |
| 15 Male   | 70-74 years      | 448.795806  | 519.1035011 | 372.0585297 |
| 15 Female | 70-74 years      | 275.6948073 | 302.6655404 | 237.0650219 |
| 16 Male   | 75-79 years      | 527.3154308 | 589.000545  | 444.7467563 |
| 16 Female | 75-79 years      | 303.7425691 | 335.3911538 | 259.8103021 |
| 17 Male   | 80-84 years      | 591.5839575 | 665.9971009 | 506.3208312 |
| 17 Female | 80-84 years      | 328.2967512 | 364.5852212 | 269.6887984 |
| 18 Male   | 85-89 years      | 703.6925716 | 794.9305989 | 599.8279714 |
| 18 Female | 85-89 years      | 360.1956037 | 409.6187581 | 284.265299  |
| 19 Male   | 90-94 years      | 849.2543073 | 941.0166039 | 703.4289237 |
| 19 Female | 90-94 years      | 453.6726807 | 520.7892107 | 342.8287678 |
| 20 Male   | 95+ years        | 800.6314064 | 906.21312   | 616.5356326 |
| 20 Female | 95+ years        | 526.0541701 | 610.8396605 | 378.4789492 |
| 21 Male   | All ages         | 158.8842978 | 188.4046021 | 120.5644363 |
| 21 Female | All ages         | 119.3293594 | 131.5999395 | 96.04664477 |
| 22 Male   | Age-standardized | 160.4132691 | 190.3124399 | 121.7801829 |
| 22 Female | Age-standardized | 115.2877614 | 127.6092224 | 92.38619939 |
