# Supplementary material
Source: publisher figshare collection journal article supplement (https://karger.figshare.com/articles/dataset/_/28787243)
Supplement: Supplementary file 7 [file 1]

Supplementary table 11:Temporal Joinpoint Analysis of Leukemia Age-Standardized  
Mortality Rates, 1990-2021

| sex       | Start | End  | val     | lower   | upper   | P.Value  | measure |
|-----------|-------|------|---------|---------|---------|----------|---------|
| 1 Both    | 1990  | 2021 | -1.1634 | -1.2344 | -1.0924 |          | 0 AAPC  |
| 2 Female  | 1990  | 2021 | -1.3541 | -1.4308 | -1.2773 |          | 0 AAPC  |
| 3 Male    | 1990  | 2021 | -1.0172 | -1.1083 | -0.9259 |          | 0 AAPC  |
| 4 Both    | 1990  | 2002 | -0.8596 | -0.9059 | -0.8133 |          | 0 APC   |
| 5 Both    | 2002  | 2007 | -1.5979 | -1.8476 | -1.3475 |          | 0 APC   |
| 6 Both    | 2007  | 2019 | -1.1667 | -1.2219 | -1.1116 |          | 0 APC   |
| 7 Both    | 2019  | 2021 | -1.8725 | -2.748  | -0.989  | 0.000258 | APC     |
| 8 Female  | 1990  | 2001 | -0.9624 | -1.0193 | -0.9055 |          | 0 APC   |
| 9 Female  | 2001  | 2007 | -1.8246 | -1.9909 | -1.6579 |          | 0 APC   |
| 10 Female | 2007  | 2014 | -1.4647 | -1.5926 | -1.3366 |          | 0 APC   |
| 11 Female | 2014  | 2018 | -1.0567 | -1.4602 | -0.6516 | 3.50E-05 | APC     |
| 12 Female | 2018  | 2021 | -1.9798 | -2.4104 | -1.5473 |          | 0 APC   |
| 13 Male   | 1990  | 1995 | -0.634  | -0.7695 | -0.4984 |          | 0 APC   |
| 14 Male   | 1995  | 1998 | -1.1631 | -1.774  | -0.5483 | 0.00111  | APC     |
| 15 Male   | 1998  | 2001 | -0.3408 | -0.9322 | 0.2542  | 0.240419 | APC     |
| 16 Male   | 2001  | 2007 | -1.2765 | -1.4053 | -1.1476 |          | 0 APC   |
| 17 Male   | 2007  | 2019 | -1.0542 | -1.0946 | -1.0138 |          | 0 APC   |
| 18 Male   | 2019  | 2021 | -1.7611 | -2.3963 | -1.1218 | 3.30E-05 | APC     |
