# Supplementary material
Source: publisher figshare collection journal article supplement (https://karger.figshare.com/articles/dataset/_/28787243)
Supplement: Supplementary file 8 [file 1]

Supplementary table 1: Age-Standardised Prevalence rates of Leukemia for Both sex by Country, 2021

|    | location                                  | val   | upper | lower | Rate_2021           |
|----|-------------------------------------------|-------|-------|-------|---------------------|
| 1  | Philippines                               | 7.88  | 9.31  | 6.16  | 7.88 (6.16–9.31)    |
| 2  | Myanmar                                   | 9.92  | 14.72 | 7.13  | 9.92 (7.13–14.72)   |
| 3  | Maldives                                  | 8.63  | 11.68 | 6.02  | 8.63 (6.02–11.68)   |
| 4  | Malaysia                                  | 14.2  | 20.35 | 11.39 | 14.2 (11.39–20.35)  |
| 5  | Tonga                                     | 5.68  | 8.69  | 3.91  | 5.68 (3.91–8.69)    |
| 6  | Vanuatu                                   | 5.74  | 8.04  | 3.9   | 5.74 (3.9–8.04)     |
| 7  | Lao<br>People's<br>Democratic<br>Republic | 9.37  | 14.02 | 6.49  | 9.37 (6.49–14.02)   |
| 8  | China                                     | 40.09 | 52.58 | 26.3  | 40.09 (26.3–52.58)  |
| 9  | Indonesia                                 | 9.5   | 14.17 | 7.5   | 9.5 (7.5–14.17)     |
| 10 | Samoa                                     | 8.32  | 13.42 | 6.06  | 8.32 (6.06–13.42)   |
| 11 | Solomon<br>Islands                        | 6.83  | 10.03 | 4.26  | 6.83 (4.26–10.03)   |
| 12 | Marshall<br>Islands                       | 6.73  | 9.56  | 4.48  | 6.73 (4.48–9.56)    |
| 13 | Micronesia<br>(Federated<br>States of)    | 7.06  | 9.92  | 4.96  | 7.06 (4.96–9.92)    |
| 14 | Tajikistan                                | 6.9   | 10.64 | 4.41  | 6.9 (4.41–10.64)    |
| 15 | Papua New<br>Guinea                       | 5.13  | 8.06  | 2.88  | 5.13 (2.88–8.06)    |
| 16 | Mongolia                                  | 5.56  | 7.1   | 4.08  | 5.56 (4.08–7.1)     |
| 17 | Viet Nam                                  | 7.91  | 10.99 | 5.69  | 7.91 (5.69–10.99)   |
| 18 | Fiji                                      | 7.3   | 10.5  | 3.98  | 7.3 (3.98–10.5)     |
| 19 | Kiribati                                  | 4.84  | 6.92  | 2.73  | 4.84 (2.73–6.92)    |
| 20 | Kazakhstan                                | 11.06 | 13.16 | 9.29  | 11.06 (9.29–13.16)  |
| 21 | Georgia                                   | 18.67 | 20.89 | 16.68 | 18.67 (16.68–20.89) |
| 22 | Kyrgyzstan                                | 8.78  | 10.32 | 7.29  | 8.78 (7.29–10.32)   |
| 23 | Hungary                                   | 34.83 | 41.98 | 29.44 | 34.83 (29.44–41.98) |
| 24 | Czechia                                   | 41.44 | 49.85 | 34.19 | 41.44 (34.19–49.85) |
| 25 | Azerbaijan                                | 12.01 | 17.33 | 8.1   | 12.01 (8.1–17.33)   |
| 26 | Taiwan<br>(Province<br>of China)          | 18.21 | 21.07 | 15.56 | 18.21 (15.56–21.07) |
| 27 | Armenia                                   | 18.26 | 20.51 | 15.93 | 18.26 (15.93–20.51) |
| 28 | Turkmenista<br>n                          | 8.89  | 11.28 | 7.03  | 8.89 (7.03–11.28)   |
| 29 | Cambodia                                  | 11.35 | 16.8  | 8.3   | 11.35 (8.3–16.8)    |
| 30 | Bosnia and<br>Herzegovina                 | 19.52 | 27.32 | 12.79 | 19.52 (12.79–27.32) |
| 31 | Russian<br>Federation                     | 25.77 | 27.87 | 23.77 | 25.77 (23.77–27.87) |
| 32 | Ukraine                                   | 21.08 | 27.38 | 16.03 | 21.08 (16.03–27.38) |
| 33 | Timor-Leste                               | 8.28  | 11.81 | 6.15  | 8.28 (6.15–11.81)   |
| 34 | Belarus                                   | 36.99 | 46.08 | 29.17 | 36.99 (29.17–46.08) |
| 35 | Latvia                                    | 36.27 | 43.66 | 30.05 | 36.27 (30.05–43.66) |
| 36 | Republic of<br>Moldova                    | 12.42 | 14.76 | 10.65 | 12.42 (10.65–14.76) |
| 37 | Uzbekistan                                | 9.74  | 11.99 | 7.84  | 9.74 (7.84–11.99)   |
| 38 | Albania                                   | 16.2  | 26.55 | 9.8   | 16.2 (9.8–26.55)    |
| 39 | Slovenia                                  | 61.08 | 74.44 | 49.57 | 61.08 (49.57–74.44) |
| 40 | Sri Lanka                                 | 10.44 | 16.1  | 6.71  | 10.44 (6.71–16.1)   |

|    |                                                |       |       |       |       |               |
|----|------------------------------------------------|-------|-------|-------|-------|---------------|
| 41 | Democratic<br>People's<br>Republic of<br>Korea | 14.47 | 20.63 | 9.55  | 14.47 | (9.55-20.63)  |
| 42 | Thailand                                       | 15.86 | 19.96 | 11.06 | 15.86 | (11.06-19.96) |
| 43 | North<br>Macedonia                             | 21.5  | 30.19 | 13.42 | 21.5  | (13.42-30.19) |
| 44 | Brunei<br>Darussalam                           | 12.96 | 15.98 | 8.97  | 12.96 | (8.97-15.98)  |
| 45 | Australia                                      | 41.67 | 46.76 | 37.2  | 41.67 | (37.2-46.76)  |
| 46 | Andorra                                        | 58.91 | 89.89 | 37.41 | 58.91 | (37.41-89.89) |
| 47 | Croatia                                        | 44.42 | 52.67 | 36.83 | 44.42 | (36.83-52.67) |
| 48 | Denmark                                        | 53.94 | 60.53 | 47.51 | 53.94 | (47.51-60.53) |
| 49 | Republic of<br>Korea                           | 20.16 | 28.03 | 12.07 | 20.16 | (12.07-28.03) |
| 50 | Finland                                        | 39.13 | 43.61 | 35.15 | 39.13 | (35.15-43.61) |
| 51 | New Zealand                                    | 52.14 | 57.26 | 47.1  | 52.14 | (47.1-57.26)  |
| 52 | Bulgaria                                       | 17.44 | 21.7  | 13.81 | 17.44 | (13.81-21.7)  |
| 53 | Serbia                                         | 26.15 | 34.92 | 18.9  | 26.15 | (18.9-34.92)  |
| 54 | Italy                                          | 56.82 | 62.05 | 52.34 | 56.82 | (52.34-62.05) |
| 55 | Luxembourg                                     | 46.71 | 53.97 | 41.26 | 46.71 | (41.26-53.97) |
| 56 | Romania                                        | 22.21 | 25.57 | 19    | 22.21 | (19-25.57)    |
| 57 | Belgium                                        | 46.05 | 52.52 | 40.22 | 46.05 | (40.22-52.52) |
| 58 | Israel                                         | 46.2  | 52.09 | 41.06 | 46.2  | (41.06-52.09) |
| 59 | Poland                                         | 32.43 | 35.88 | 29.28 | 32.43 | (29.28-35.88) |
| 60 | Montenegro                                     | 29.1  | 41.4  | 19.53 | 29.1  | (19.53-41.4)  |
| 61 | Sweden                                         | 42.07 | 47.48 | 37.26 | 42.07 | (37.26-47.48) |
| 62 | Switzerland                                    | 51.38 | 59.18 | 44.61 | 51.38 | (44.61-59.18) |
| 63 | United<br>States of<br>America                 | 39.75 | 41.42 | 37.34 | 39.75 | (37.34-41.42) |
| 64 | Lithuania                                      | 31.61 | 37.06 | 26.63 | 31.61 | (26.63-37.06) |
| 65 | Dominican<br>Republic                          | 9.1   | 12    | 6.74  | 9.1   | (6.74-12)     |
| 66 | Japan                                          | 26.73 | 28.89 | 24.69 | 26.73 | (24.69-28.89) |
| 67 | Netherlands                                    | 36.48 | 40.75 | 32.15 | 36.48 | (32.15-40.75) |
| 68 | Dominica                                       | 13.67 | 17.69 | 9.71  | 13.67 | (9.71-17.69)  |
| 69 | Estonia                                        | 43.07 | 51.28 | 35.27 | 43.07 | (35.27-51.28) |
| 70 | Chile                                          | 16.75 | 19.07 | 14.74 | 16.75 | (14.74-19.07) |
| 71 | Guyana                                         | 7.09  | 9.22  | 5.37  | 7.09  | (5.37-9.22)   |
| 72 | Germany                                        | 56.84 | 62.36 | 51.98 | 56.84 | (51.98-62.36) |
| 73 | Saint<br>Vincent and<br>the<br>Grenadines      | 15.3  | 17.73 | 13.2  | 15.3  | (13.2-17.73)  |
| 74 | Austria                                        | 46.05 | 51.53 | 40.19 | 46.05 | (40.19-51.53) |
| 75 | Ireland                                        | 40.59 | 45.45 | 36.46 | 40.59 | (36.46-45.45) |
| 76 | Malta                                          | 38.16 | 45.48 | 31.52 | 38.16 | (31.52-45.48) |
| 77 | Bolivia<br>(Plurinatio<br>nal State<br>of)     | 14.34 | 19.08 | 9.86  | 14.34 | (9.86-19.08)  |
| 78 | Portugal                                       | 38.56 | 44.27 | 33.69 | 38.56 | (33.69-44.27) |
| 79 | Slovakia                                       | 33.64 | 44.32 | 22.64 | 33.64 | (22.64-44.32) |
| 80 | Iceland                                        | 45.05 | 51.27 | 39.19 | 45.05 | (39.19-51.27) |
| 81 | United                                         | 40.54 | 42.39 | 38.52 | 40.54 | (38.52-42.39) |

|     |                                             |       |       |       |                     |
|-----|---------------------------------------------|-------|-------|-------|---------------------|
|     | Kingdom                                     |       |       |       |                     |
| 82  | Barbados                                    | 16.6  | 21.24 | 12.99 | 16.6 (12.99–21.24)  |
| 83  | Bahamas                                     | 11.38 | 14.31 | 8.94  | 11.38 (8.94–14.31)  |
| 84  | Brazil                                      | 10.22 | 10.87 | 9.6   | 10.22 (9.6–10.87)   |
| 85  | Spain                                       | 51.08 | 57.09 | 45.03 | 51.08 (45.03–57.09) |
| 86  | France                                      | 51.71 | 58.3  | 45.64 | 51.71 (45.64–58.3)  |
| 87  | Belize                                      | 10.76 | 12.26 | 9.46  | 10.76 (9.46–12.26)  |
| 88  | Greece                                      | 54.33 | 59.1  | 49.52 | 54.33 (49.52–59.1)  |
| 89  | Trinidad<br>and Tobago                      | 10.2  | 12.95 | 7.82  | 10.2 (7.82–12.95)   |
| 90  | Cuba                                        | 16.73 | 19.53 | 14.26 | 16.73 (14.26–19.53) |
| 91  | Panama                                      | 16.93 | 21.19 | 13.74 | 16.93 (13.74–21.19) |
| 92  | Cyprus                                      | 50.93 | 65.32 | 31.94 | 50.93 (31.94–65.32) |
| 93  | Canada                                      | 46.32 | 50.77 | 42.07 | 46.32 (42.07–50.77) |
| 94  | Antigua and<br>Barbuda                      | 10.03 | 11.28 | 9.07  | 10.03 (9.07–11.28)  |
| 95  | Grenada                                     | 17.28 | 19.67 | 14.8  | 17.28 (14.8–19.67)  |
| 96  | Haiti                                       | 11.88 | 17.27 | 7.48  | 11.88 (7.48–17.27)  |
| 97  | Argentina                                   | 14.26 | 15.95 | 12.75 | 14.26 (12.75–15.95) |
| 98  | Bahrain                                     | 17.76 | 23.67 | 12.86 | 17.76 (12.86–23.67) |
| 99  | Suriname                                    | 9.33  | 12.1  | 6.89  | 9.33 (6.89–12.1)    |
| 100 | Uruguay                                     | 24.57 | 27.28 | 21.98 | 24.57 (21.98–27.28) |
| 101 | Saint Lucia                                 | 11.94 | 14.76 | 9.71  | 11.94 (9.71–14.76)  |
| 102 | Peru                                        | 17.85 | 23.79 | 11.2  | 17.85 (11.2–23.79)  |
| 103 | Ecuador                                     | 13.8  | 16.7  | 11.22 | 13.8 (11.22–16.7)   |
| 104 | Costa Rica                                  | 23.15 | 26.82 | 20    | 23.15 (20–26.82)    |
| 105 | Singapore                                   | 22    | 25.21 | 19.27 | 22 (19.27–25.21)    |
| 106 | Norway                                      | 39.24 | 43    | 35.56 | 39.24 (35.56–43)    |
| 107 | Guatemala                                   | 10.17 | 11.91 | 8.71  | 10.17 (8.71–11.91)  |
| 108 | Jamaica                                     | 14.36 | 19.06 | 10.9  | 14.36 (10.9–19.06)  |
| 109 | El Salvador                                 | 17.82 | 22.75 | 12.64 | 17.82 (12.64–22.75) |
| 110 | Mexico                                      | 12.33 | 13.83 | 11.05 | 12.33 (11.05–13.83) |
| 111 | Colombia                                    | 15.83 | 19.47 | 13.03 | 15.83 (13.03–19.47) |
| 112 | Algeria                                     | 10.28 | 13.84 | 7.25  | 10.28 (7.25–13.84)  |
| 113 | Paraguay                                    | 13.26 | 17.89 | 9.43  | 13.26 (9.43–17.89)  |
| 114 | Honduras                                    | 9.47  | 12.91 | 6.86  | 9.47 (6.86–12.91)   |
| 115 | Nicaragua                                   | 9.81  | 12.3  | 7.17  | 9.81 (7.17–12.3)    |
| 116 | Venezuela<br>(Bolivarian<br>Republic<br>of) | 11.89 | 16.29 | 8.52  | 11.89 (8.52–16.29)  |
| 117 | Egypt                                       | 17.29 | 22.94 | 10.73 | 17.29 (10.73–22.94) |
| 118 | Iran<br>(Islamic<br>Republic<br>of)         | 22.56 | 29.13 | 11.51 | 22.56 (11.51–29.13) |
| 119 | Iraq                                        | 17.62 | 23.3  | 12.34 | 17.62 (12.34–23.3)  |
| 120 | Jordan                                      | 17.74 | 24.26 | 11.4  | 17.74 (11.4–24.26)  |
| 121 | Kuwait                                      | 21.02 | 26.43 | 16.56 | 21.02 (16.56–26.43) |
| 122 | Afghanistan                                 | 16.86 | 24.75 | 9.81  | 16.86 (9.81–24.75)  |
| 123 | Oman                                        | 13.59 | 18.87 | 9.1   | 13.59 (9.1–18.87)   |
| 124 | Türkiye                                     | 24    | 30.51 | 16.42 | 24 (16.42–30.51)    |
| 125 | Lebanon                                     | 23.79 | 32.52 | 15.99 | 23.79 (15.99–32.52) |

|     |                                  |       |       |       |                     |
|-----|----------------------------------|-------|-------|-------|---------------------|
| 126 | Palestine                        | 29.88 | 38.59 | 24    | 29.88 (24-38.59)    |
| 127 | Saudi Arabia                     | 16.39 | 25.3  | 11.85 | 16.39 (11.85-25.3)  |
| 128 | Qatar                            | 27.33 | 38.51 | 16.35 | 27.33 (16.35-38.51) |
| 129 | Morocco                          | 2.77  | 3.66  | 1.83  | 2.77 (1.83-3.66)    |
| 130 | Tunisia                          | 11.73 | 17.46 | 6.81  | 11.73 (6.81-17.46)  |
| 131 | Libya                            | 21.88 | 30.37 | 15.07 | 21.88 (15.07-30.37) |
| 132 | Yemen                            | 11.45 | 17.07 | 6.07  | 11.45 (6.07-17.07)  |
| 133 | Syrian Arab Republic             | 22.97 | 32.38 | 14.8  | 22.97 (14.8-32.38)  |
| 134 | Angola                           | 3.94  | 5.99  | 2.2   | 3.94 (2.2-5.99)     |
| 135 | Nepal                            | 6.84  | 9.66  | 4.99  | 6.84 (4.99-9.66)    |
| 136 | United Arab Emirates             | 19.04 | 25.76 | 13.37 | 19.04 (13.37-25.76) |
| 137 | Bangladesh                       | 7.17  | 10.21 | 4.9   | 7.17 (4.9-10.21)    |
| 138 | Congo                            | 4.5   | 6.41  | 2.73  | 4.5 (2.73-6.41)     |
| 139 | Burundi                          | 5.41  | 8.33  | 3.11  | 5.41 (3.11-8.33)    |
| 140 | Bhutan                           | 7.33  | 11.16 | 4.73  | 7.33 (4.73-11.16)   |
| 141 | India                            | 6.54  | 8.02  | 5.07  | 6.54 (5.07-8.02)    |
| 142 | Djibouti                         | 6.47  | 10.47 | 3.75  | 6.47 (3.75-10.47)   |
| 143 | Pakistan                         | 8.36  | 11.32 | 6.22  | 8.36 (6.22-11.32)   |
| 144 | Comoros                          | 6.49  | 9.16  | 4.4   | 6.49 (4.4-9.16)     |
| 145 | Equatorial Guinea                | 4.98  | 8.18  | 2.48  | 4.98 (2.48-8.18)    |
| 146 | Gabon                            | 4.96  | 7.3   | 2.83  | 4.96 (2.83-7.3)     |
| 147 | Madagascar                       | 4.85  | 6.67  | 3.09  | 4.85 (3.09-6.67)    |
| 148 | Mauritius                        | 12.98 | 13.9  | 12.03 | 12.98 (12.03-13.9)  |
| 149 | Democratic Republic of the Congo | 3.65  | 5.54  | 2.03  | 3.65 (2.03-5.54)    |
| 150 | Central African Republic         | 3.79  | 5.29  | 2.37  | 3.79 (2.37-5.29)    |
| 151 | Somalia                          | 6.1   | 8.7   | 4.08  | 6.1 (4.08-8.7)      |
| 152 | Rwanda                           | 6.32  | 9.33  | 3.98  | 6.32 (3.98-9.33)    |
| 153 | Eritrea                          | 6.25  | 8.41  | 4.03  | 6.25 (4.03-8.41)    |
| 154 | Ethiopia                         | 17.42 | 27.9  | 11.77 | 17.42 (11.77-27.9)  |
| 155 | Malawi                           | 1.93  | 2.92  | 1.15  | 1.93 (1.15-2.92)    |
| 156 | Seychelles                       | 17.77 | 23.01 | 14.51 | 17.77 (14.51-23.01) |
| 157 | Botswana                         | 5.71  | 8.19  | 3.52  | 5.71 (3.52-8.19)    |
| 158 | Mozambique                       | 8.46  | 12.03 | 5.73  | 8.46 (5.73-12.03)   |
| 159 | Namibia                          | 4.92  | 6.83  | 3.4   | 4.92 (3.4-6.83)     |
| 160 | Uganda                           | 5.05  | 7.44  | 3.03  | 5.05 (3.03-7.44)    |
| 161 | Kenya                            | 5.2   | 7.24  | 3.65  | 5.2 (3.65-7.24)     |
| 162 | Lesotho                          | 7.29  | 9.93  | 5.2   | 7.29 (5.2-9.93)     |
| 163 | Cote d'Ivoire                    | 1.95  | 2.85  | 1.04  | 1.95 (1.04-2.85)    |
| 164 | Zambia                           | 6.72  | 9.35  | 4.24  | 6.72 (4.24-9.35)    |
| 165 | United Republic of Tanzania      | 6.48  | 9.49  | 3.97  | 6.48 (3.97-9.49)    |
| 166 | Ghana                            | 3.43  | 4.89  | 2.38  | 3.43 (2.38-4.89)    |
| 167 | Guinea                           | 0.85  | 1.29  | 0.48  | 0.85 (0.48-1.29)    |
| 168 | South Africa                     | 8.57  | 10.24 | 5.28  | 8.57 (5.28-10.24)   |

|     |                              |                    |                         |                         |        |                |
|-----|------------------------------|--------------------|-------------------------|-------------------------|--------|----------------|
| 169 | Eswatini                     | 7.33               | 10.99                   | 4.79                    | 7.33   | (4.79–10.99)   |
| 170 | Zimbabwe                     | 7.62               | 10.16                   | 5.37                    | 7.62   | (5.37–10.16)   |
| 171 | Burkina Faso                 | 2.91               | 4.04                    | 1.3                     | 2.91   | (1.3–4.04)     |
| 172 | Cameroon                     | 3.34               | 5.1                     | 1.48                    | 3.34   | (1.48–5.1)     |
| 173 | Liberia                      | 3.2                | 4.83                    | 1.38                    | 3.2    | (1.38–4.83)    |
| 174 | Nigeria                      | 2.34               | 3.24                    | 1.21                    | 2.34   | (1.21–3.24)    |
| 175 | Benin                        | 2.93               | 4.12                    | 1.33                    | 2.93   | (1.33–4.12)    |
| 176 | Cabo Verde                   | 10.75              | 14.39                   | 7.13                    | 10.75  | (7.13–14.39)   |
| 177 | Gambia                       | 1.38               | 1.83                    | 0.87                    | 1.38   | (0.87–1.83)    |
| 178 | Senegal                      | 3.13               | 4.75                    | 1.43                    | 3.13   | (1.43–4.75)    |
| 179 | Sao Tome and Principe        | 1.92               | 2.73                    | 1.2                     | 1.92   | (1.2–2.73)     |
| 180 | Mauritania                   | 3.38               | 4.91                    | 1.53                    | 3.38   | (1.53–4.91)    |
| 181 | Chad                         | 2.8                | 4.04                    | 1.32                    | 2.8    | (1.32–4.04)    |
| 182 | Mali                         | 1.69               | 2.32                    | 1.02                    | 1.69   | (1.02–2.32)    |
| 183 | Guinea-Bissau                | 3.33               | 4.69                    | 1.72                    | 3.33   | (1.72–4.69)    |
| 184 | Cook Islands                 | 2.97               | 4.26                    | 1.92                    | 2.97   | (1.92–4.26)    |
| 185 | Monaco                       | 139.2 <sub>5</sub> | 189.55                  | 94.43                   | 139.25 | (94.43–189.55) |
| 186 | Nauru                        | 8.34               | 12.33                   | 5.45                    | 8.34   | (5.45–12.33)   |
| 187 | Niue                         | 12.27              | 15.83                   | 8.91                    | 12.27  | (8.91–15.83)   |
| 188 | Northern Mariana Islands     | 11.23              | 14.3                    | 5.74                    | 11.23  | (5.74–14.3)    |
| 189 | Togo                         | 3.17               | 4.62                    | 1.35                    | 3.17   | (1.35–4.62)    |
| 190 | Guam                         | 5.83               | 7.63                    | 4.51                    | 5.83   | (4.51–7.63)    |
| 191 | Sierra Leone                 | 2.85               | 4.1                     | 1.22                    | 2.85   | (1.22–4.1)     |
| 192 | Greenland                    | 7.67               | 10.59                   | 5.52                    | 7.67   | (5.52–10.59)   |
| 193 | Bermuda                      | 22.92              | 28.97                   | 18.05                   | 22.92  | (18.05–28.97)  |
| 194 | United States Virgin Islands | 12.86              | 17.56                   | 8.68                    | 12.86  | (8.68–17.56)   |
| 195 | American Samoa               | 9.54               | 12.4                    | 6.65                    | 9.54   | (6.65–12.4)    |
| 196 | Niger                        | 2.49               | 4.23                    | 1.06                    | 2.49   | (1.06–4.23)    |
| 197 | Palau                        | 7.01               | 8.96                    | 5.13                    | 7.01   | (5.13–8.96)    |
| 198 | San Marino                   | 84.77              | 121.66                  | 52.59                   | 84.77  | (52.59–121.66) |
| 199 | South Sudan                  | 7.17               | 10.01                   | 4.68                    | 7.17   | (4.68–10.01)   |
| 200 | Saint Kitts and Nevis        | 13.77              | 16.57                   | 11.36                   | 13.77  | (11.36–16.57)  |
| 201 | Tuvalu                       | 6.28               | 8.39                    | 4.44                    | 6.28   | (4.44–8.39)    |
| 202 | Tokelau                      | 13.71              | 22.05                   | 8.08                    | 13.71  | (8.08–22.05)   |
| 203 | Puerto Rico                  | 20.12              | 23.91                   | 16.59                   | 20.12  | (16.59–23.91)  |
| 204 | Sudan                        | 13.52              | 19.22                   | 8.37                    | 13.52  | (8.37–19.22)   |
|     | The average ASPR             | 18.29 <sub>5</sub> | 22.964 <sub>70588</sub> | 14.2139 <sub>7059</sub> | 18.3   | (14.21–22.96)  |

---
