# Supplementary material
Source: publisher figshare collection journal article supplement (https://karger.figshare.com/articles/dataset/_/28787243)
Supplement: Supplementary file 9 [file 1]

Supplementary table 6:Global Age Structure of Leukemia Incidence  
Rate, 2021

| sex       | age              | val         | upper       | lower       |
|-----------|------------------|-------------|-------------|-------------|
| 1 Male    | <5 years         | 5.241719511 | 7.574808686 | 3.186534539 |
| 1 Female  | <5 years         | 4.030031485 | 5.44919195  | 2.579534672 |
| 2 Male    | 5-9 years        | 2.593029726 | 3.228378065 | 1.796254705 |
| 2 Female  | 5-9 years        | 1.806207043 | 2.078356089 | 1.349872354 |
| 3 Male    | 10-14 years      | 2.148072846 | 2.621438351 | 1.527655673 |
| 3 Female  | 10-14 years      | 1.721469898 | 1.919751812 | 1.336402495 |
| 4 Male    | 15-19 years      | 2.027324583 | 2.440729092 | 1.463515787 |
| 4 Female  | 15-19 years      | 1.590034062 | 1.806830761 | 1.183490377 |
| 5 Male    | 20-24 years      | 1.988448943 | 2.338535281 | 1.38702296  |
| 5 Female  | 20-24 years      | 1.493500423 | 1.681701559 | 1.097349271 |
| 6 Male    | 25-29 years      | 2.181395957 | 2.549453351 | 1.54550869  |
| 6 Female  | 25-29 years      | 1.569579655 | 1.785245669 | 1.214498858 |
| 7 Male    | 30-34 years      | 2.396005824 | 2.892755254 | 1.695922776 |
| 7 Female  | 30-34 years      | 1.744871798 | 1.991438941 | 1.350712439 |
| 8 Male    | 35-39 years      | 2.915167298 | 3.483016926 | 2.069833568 |
| 8 Female  | 35-39 years      | 2.185209729 | 2.514521155 | 1.660344323 |
| 9 Male    | 40-44 years      | 3.59335644  | 4.460585217 | 2.682859889 |
| 9 Female  | 40-44 years      | 2.758303988 | 3.163753265 | 2.171533873 |
| 10 Male   | 45-49 years      | 4.592603984 | 5.66885055  | 3.462848283 |
| 10 Female | 45-49 years      | 3.498427636 | 4.006322611 | 2.748824732 |
| 11 Male   | 50-54 years      | 6.649173628 | 8.032942703 | 4.920736687 |
| 11 Female | 50-54 years      | 4.940034338 | 5.727232447 | 3.735237776 |
| 12 Male   | 55-59 years      | 9.698556246 | 12.17757958 | 7.472458571 |
| 12 Female | 55-59 years      | 7.072229386 | 8.136153195 | 5.471879395 |
| 13 Male   | 60-64 years      | 14.20929385 | 16.49858398 | 11.33671237 |
| 13 Female | 60-64 years      | 9.681877581 | 10.80963586 | 7.9731135   |
| 14 Male   | 65-69 years      | 20.26313451 | 23.21227193 | 16.61444497 |
| 14 Female | 65-69 years      | 13.26341265 | 14.80485038 | 11.13472236 |
| 15 Male   | 70-74 years      | 30.43169745 | 33.85385773 | 25.76675173 |
| 15 Female | 70-74 years      | 18.89885222 | 20.61505705 | 16.30429602 |
| 16 Male   | 75-79 years      | 42.70727085 | 46.65411119 | 36.77521081 |
| 16 Female | 75-79 years      | 25.05074525 | 27.36203348 | 21.64582514 |
| 17 Male   | 80-84 years      | 51.05504455 | 56.30128068 | 44.38380115 |
| 17 Female | 80-84 years      | 29.15112896 | 32.48630441 | 23.42427742 |
| 18 Male   | 85-89 years      | 71.32864956 | 79.24954465 | 61.40548033 |
| 18 Female | 85-89 years      | 38.9283038  | 44.29756675 | 30.04851812 |
| 19 Male   | 90-94 years      | 90.2844236  | 99.79849266 | 74.64808025 |
| 19 Female | 90-94 years      | 51.92051761 | 59.73616921 | 38.74791928 |
| 20 Male   | 95+ years        | 75.2568626  | 85.75303951 | 57.92045792 |
| 20 Female | 95+ years        | 50.04364514 | 58.28435432 | 35.83195089 |
| 21 Male   | All ages         | 6.660427329 | 7.636032892 | 5.350444722 |
| 21 Female | All ages         | 5.028287457 | 5.540868799 | 4.190462627 |
| 22 Male   | Age-standardized | 6.835085995 | 7.808408646 | 5.509602808 |
| 22 Female | Age-standardized | 4.599642907 | 5.056744298 | 3.807504413 |
