# Supplementary material
Source: publisher figshare collection journal article supplement (https://karger.figshare.com/articles/dataset/_/28787243)
Supplement: Supplementary file 10 [file 1]

Supplementary table 9:Temporal Joinpoint Analysis of Leukemia Age-Standardized  
Prevalence Rates, 1990-2021

| sex       | Start | End  | val     | lower   | upper   | P.Value  | measure |
|-----------|-------|------|---------|---------|---------|----------|---------|
| 1 Both    | 1990  | 2021 | 0.1843  | 0.0256  | 0.3433  | 0.022845 | AAPC    |
| 2 Female  | 1990  | 2021 | 0.0071  | -0.1742 | 0.1887  | 0.938845 | AAPC    |
| 3 Male    | 1990  | 2021 | 0.3155  | 0.1536  | 0.4776  | 0.000132 | AAPC    |
| 4 Both    | 1990  | 1997 | 1.3956  | 1.2289  | 1.5625  |          | 0 APC   |
| 5 Both    | 1997  | 2003 | 0.0636  | -0.1955 | 0.3233  | 0.612699 | APC     |
| 6 Both    | 2003  | 2009 | 1.0308  | 0.7418  | 1.3205  | 1.00E-06 | APC     |
| 7 Both    | 2009  | 2019 | -0.5091 | -0.6584 | -0.3595 | 1.00E-06 | APC     |
| 8 Both    | 2019  | 2021 | -2.6752 | -4.7631 | -0.5416 | 0.017097 | APC     |
| 9 Female  | 1990  | 1997 | 1.3377  | 1.1954  | 1.4803  |          | 0 APC   |
| 10 Female | 1997  | 2003 | -0.1186 | -0.3356 | 0.0989  | 0.263129 | APC     |
| 11 Female | 2003  | 2010 | 0.6208  | 0.446   | 0.796   | 2.00E-06 | APC     |
| 12 Female | 2010  | 2016 | -0.821  | -1.0848 | -0.5566 | 8.00E-06 | APC     |
| 13 Female | 2016  | 2019 | 0.1011  | -1.3813 | 1.6057  | 0.887178 | APC     |
| 14 Female | 2019  | 2021 | -3.9492 | -5.5049 | -2.3679 | 9.60E-05 | APC     |
| 15 Male   | 1990  | 1996 | 1.6006  | 1.3627  | 1.8391  |          | 0 APC   |
| 16 Male   | 1996  | 2003 | 0.2762  | 0.0511  | 0.5019  | 0.018929 | APC     |
| 17 Male   | 2003  | 2008 | 1.495   | 1.0536  | 1.9382  | 1.00E-06 | APC     |
| 18 Male   | 2008  | 2019 | -0.3907 | -0.5218 | -0.2593 | 7.00E-06 | APC     |
| 19 Male   | 2019  | 2021 | -2.3756 | -4.3958 | -0.3128 | 0.026554 | APC     |
