# Supplementary material
Source: publisher figshare collection journal article supplement (https://karger.figshare.com/articles/dataset/_/28787243)
Supplement: Supplementary file 11 [file 1]

Supplementary table 12:Temporal Joinpoint Analysis of Leukemia Age-Standardized DALYs Rates, 1990-2021

| sex       | Start | End  | val     | lower   | upper   | P.Value  | measure |
|-----------|-------|------|---------|---------|---------|----------|---------|
| 1 Both    | 1990  | 2021 | -1.6151 | -1.6998 | -1.5304 |          | 0 AAPC  |
| 2 Female  | 1990  | 2021 | -1.8254 | -1.913  | -1.7377 |          | 0 AAPC  |
| 3 Male    | 1990  | 2021 | -1.4714 | -1.5428 | -1.3999 |          | 0 AAPC  |
| 4 Both    | 1990  | 1993 | -0.9915 | -1.3956 | -0.5856 | 0.000109 | APC     |
| 5 Both    | 1993  | 2001 | -1.4844 | -1.5901 | -1.3786 |          | 0 APC   |
| 6 Both    | 2001  | 2007 | -2.0081 | -2.1742 | -1.8417 |          | 0 APC   |
| 7 Both    | 2007  | 2014 | -1.603  | -1.7297 | -1.4761 |          | 0 APC   |
| 8 Both    | 2014  | 2018 | -1.2579 | -1.653  | -0.8612 | 7.00E-06 | APC     |
| 9 Both    | 2018  | 2021 | -2.2992 | -2.7292 | -1.8673 |          | 0 APC   |
| 10 Female | 1990  | 2000 | -1.4729 | -1.5615 | -1.3842 |          | 0 APC   |
| 11 Female | 2000  | 2007 | -2.2963 | -2.4595 | -2.1328 |          | 0 APC   |
| 12 Female | 2007  | 2014 | -1.8372 | -1.9863 | -1.6879 |          | 0 APC   |
| 13 Female | 2014  | 2018 | -1.311  | -1.7664 | -0.8534 | 1.10E-05 | APC     |
| 14 Female | 2018  | 2021 | -2.5509 | -3.0171 | -2.0826 |          | 0 APC   |
| 15 Male   | 1990  | 1993 | -0.8753 | -1.2785 | -0.4704 | 0.000259 | APC     |
| 16 Male   | 1993  | 2001 | -1.386  | -1.4872 | -1.2846 |          | 0 APC   |
| 17 Male   | 2001  | 2007 | -1.7597 | -1.9187 | -1.6005 |          | 0 APC   |
| 18 Male   | 2007  | 2019 | -1.3856 | -1.434  | -1.3371 |          | 0 APC   |
| 19 Male   | 2019  | 2021 | -2.3485 | -3.0938 | -1.5975 | 4.00E-06 | APC     |
