# Supplementary material
Source: publisher figshare collection journal article supplement (https://karger.figshare.com/articles/dataset/_/28787243)
Supplement: Supplementary file 12 [file 1]

Supplementary table 4:Age-Standardised DALYs rates of Leukemia for Both sex by  
Country, 2021

|    | location                                       | val    | upper  | lower  | Rate_2021              |
|----|------------------------------------------------|--------|--------|--------|------------------------|
| 1  | Sri Lanka                                      | 113.59 | 157.53 | 76.58  | 113.59 (76.58–157.53)  |
| 2  | Tonga                                          | 108.13 | 147.47 | 74.47  | 108.13 (74.47–147.47)  |
| 3  | Uzbekistan                                     | 138.64 | 169    | 114.25 | 138.64 (114.25–169)    |
| 4  | Serbia                                         | 116.7  | 142.8  | 87.37  | 116.7 (87.37–142.8)    |
| 5  | Cambodia                                       | 230.16 | 305.83 | 165    | 230.16 (165–305.83)    |
| 6  | Fiji                                           | 197.02 | 272.81 | 109.47 | 197.02 (109.47–272.81) |
| 7  | Azerbaijan                                     | 161.58 | 224.7  | 113.84 | 161.58 (113.84–224.7)  |
| 8  | Croatia                                        | 128.69 | 154.7  | 106.97 | 128.69 (106.97–154.7)  |
| 9  | Lao People's<br>Democratic<br>Republic         | 209.05 | 283.05 | 149.56 | 209.05 (149.56–283.05) |
| 10 | Ireland                                        | 90.38  | 98.48  | 83.35  | 90.38 (83.35–98.48)    |
| 11 | Estonia                                        | 135.97 | 153.28 | 116.98 | 135.97 (116.98–153.28) |
| 12 | Marshall<br>Islands                            | 162.08 | 226.71 | 105.93 | 162.08 (105.93–226.71) |
| 13 | Kazakhstan                                     | 106    | 118.08 | 95.32  | 106 (95.32–118.08)     |
| 14 | Hungary                                        | 143.92 | 173.61 | 119.25 | 143.92 (119.25–173.61) |
| 15 | Belize                                         | 107.63 | 120.18 | 96.51  | 107.63 (96.51–120.18)  |
| 16 | Lithuania                                      | 157.12 | 175.66 | 137.07 | 157.12 (137.07–175.66) |
| 17 | Panama                                         | 190.24 | 225.54 | 158.91 | 190.24 (158.91–225.54) |
| 18 | United Arab<br>Emirates                        | 155.72 | 202.22 | 119.21 | 155.72 (119.21–202.22) |
| 19 | Cyprus                                         | 122.67 | 152.83 | 85.22  | 122.67 (85.22–152.83)  |
| 20 | Netherlands                                    | 101.44 | 109.25 | 94.56  | 101.44 (94.56–109.25)  |
| 21 | Democratic<br>People's<br>Republic of<br>Korea | 187.57 | 265.5  | 134.5  | 187.57 (134.5–265.5)   |
| 22 | Canada                                         | 113.08 | 121.64 | 104.94 | 113.08 (104.94–121.64) |
| 23 | Finland                                        | 95.77  | 103.04 | 88.57  | 95.77 (88.57–103.04)   |
| 24 | New Zealand                                    | 119    | 125.07 | 112.31 | 119 (112.31–125.07)    |

|    |                     |        |        |        |                        |
|----|---------------------|--------|--------|--------|------------------------|
| 25 | Timor-Leste         | 179.2  | 234.58 | 133.61 | 179.2 (133.61-234.58)  |
| 26 | Guyana              | 134.45 | 172.61 | 103.32 | 134.45 (103.32-172.61) |
| 27 | Portugal            | 113.78 | 122.89 | 104.86 | 113.78 (104.86-122.89) |
| 28 | Albania             | 97.61  | 137.85 | 67.66  | 97.61 (67.66-137.85)   |
| 29 | Slovenia            | 110.2  | 127.79 | 94.21  | 110.2 (94.21-127.79)   |
| 30 | Colombia            | 175.72 | 207.64 | 147.53 | 175.72 (147.53-207.64) |
| 31 | Japan               | 91.59  | 94.71  | 87.07  | 91.59 (87.07-94.71)    |
| 32 | Bulgaria            | 151.83 | 183.06 | 123.46 | 151.83 (123.46-183.06) |
| 33 | Jamaica             | 131.11 | 169.38 | 100.75 | 131.11 (100.75-169.38) |
| 34 | Belarus             | 144.2  | 175.05 | 119.18 | 144.2 (119.18-175.05)  |
| 35 | Singapore           | 87.57  | 95.13  | 80.79  | 87.57 (80.79-95.13)    |
| 36 | Cote d'Ivoire       | 34.99  | 52.33  | 19.78  | 34.99 (19.78-52.33)    |
| 37 | Maldives            | 89.57  | 118.43 | 64.96  | 89.57 (64.96-118.43)   |
| 38 | El Salvador         | 211.09 | 261.8  | 152.18 | 211.09 (152.18-261.8)  |
| 39 | Algeria             | 83.21  | 107.07 | 61.37  | 83.21 (61.37-107.07)   |
| 40 | Ghana               | 58.86  | 85.62  | 39.78  | 58.86 (39.78-85.62)    |
| 41 | India               | 94.82  | 114.8  | 75.53  | 94.82 (75.53-114.8)    |
| 42 | Montenegro          | 116.84 | 145.18 | 92.81  | 116.84 (92.81-145.18)  |
| 43 | Russian Federation  | 119.54 | 128.02 | 111.82 | 119.54 (111.82-128.02) |
| 44 | Cook Islands        | 40.35  | 52.81  | 27.91  | 40.35 (27.91-52.81)    |
| 45 | Andorra             | 127.18 | 175.38 | 83.64  | 127.18 (83.64-175.38)  |
| 46 | Sweden              | 94.73  | 104.28 | 85.44  | 94.73 (85.44-104.28)   |
| 47 | Papua New Guinea    | 136.43 | 196.38 | 78.21  | 136.43 (78.21-196.38)  |
| 48 | Belgium             | 131.05 | 142.19 | 120.91 | 131.05 (120.91-142.19) |
| 49 | Antigua and Barbuda | 127.75 | 135.75 | 120.44 | 127.75 (120.44-135.75) |
| 50 | Honduras            | 182.25 | 258.82 | 126.14 | 182.25 (126.14-258.82) |
| 51 | San Marino          | 135.92 | 194.8  | 89.08  | 135.92 (89.08-194.8)   |
| 52 | Egypt               | 214.87 | 270.79 | 148.57 | 214.87 (148.57-270.79) |
| 53 | Mauritania          | 46.94  | 70.21  | 24.14  | 46.94 (24.14-70.21)    |
| 54 | Monaco              | 302.64 | 373.64 | 223.33 | 302.64 (223.33-373.64) |

|    |                                        |        |        |        |                        |
|----|----------------------------------------|--------|--------|--------|------------------------|
| 55 | Mali                                   | 35.37  | 53.52  | 21.68  | 35.37 (21.68–53.52)    |
| 56 | Saint Vincent<br>and the<br>Grenadines | 168.7  | 194.38 | 146.3  | 168.7 (146.3–194.38)   |
| 57 | Nigeria                                | 49.23  | 66.53  | 27.13  | 49.23 (27.13–66.53)    |
| 58 | Niue                                   | 277.47 | 343.33 | 205    | 277.47 (205–343.33)    |
| 59 | Pakistan                               | 149.82 | 203.55 | 112.87 | 149.82 (112.87–203.55) |
| 60 | Dominica                               | 225.74 | 285.31 | 166.03 | 225.74 (166.03–285.31) |
| 61 | Djibouti                               | 96.13  | 157.65 | 54.21  | 96.13 (54.21–157.65)   |
| 62 | Uganda                                 | 76.19  | 111.06 | 45.43  | 76.19 (45.43–111.06)   |
| 63 | Grenada                                | 156.67 | 176.34 | 137.01 | 156.67 (137.01–176.34) |
| 64 | Ethiopia                               | 252.01 | 367.3  | 178.46 | 252.01 (178.46–367.3)  |
| 65 | Chile                                  | 116.23 | 123.79 | 108.83 | 116.23 (108.83–123.79) |
| 66 | Paraguay                               | 166.34 | 213.56 | 121.14 | 166.34 (121.14–213.56) |
| 67 | Senegal                                | 54.82  | 84.89  | 26.82  | 54.82 (26.82–84.89)    |
| 68 | Cameroon                               | 60.78  | 88.01  | 29.2   | 60.78 (29.2–88.01)     |
| 69 | Equatorial<br>Guinea                   | 70.36  | 116.48 | 35.97  | 70.36 (35.97–116.48)   |
| 70 | Chad                                   | 63.16  | 91.69  | 32.59  | 63.16 (32.59–91.69)    |
| 71 | Mozambique                             | 145.93 | 218.7  | 93.49  | 145.93 (93.49–218.7)   |
| 72 | Eswatini                               | 136.85 | 204.53 | 89.36  | 136.85 (89.36–204.53)  |
| 73 | Ecuador                                | 212.19 | 252.42 | 175.98 | 212.19 (175.98–252.42) |
| 74 | Guinea-Bissau                          | 67.23  | 90.71  | 38.16  | 67.23 (38.16–90.71)    |
| 75 | Angola                                 | 77.34  | 115.58 | 47.65  | 77.34 (47.65–115.58)   |
| 76 | Armenia                                | 132.63 | 148.51 | 118.3  | 132.63 (118.3–148.51)  |
| 77 | Syrian Arab<br>Republic                | 204.7  | 279.86 | 147.58 | 204.7 (147.58–279.86)  |
| 78 | Guam                                   | 108.4  | 131.51 | 82.85  | 108.4 (82.85–131.51)   |
| 79 | Kenya                                  | 72.92  | 99.27  | 52.15  | 72.92 (52.15–99.27)    |
| 80 | Botswana                               | 96.68  | 136.02 | 66.46  | 96.68 (66.46–136.02)   |
| 81 | Germany                                | 121.05 | 128.97 | 112.99 | 121.05 (112.99–128.97) |
| 82 | Italy                                  | 128.5  | 135.84 | 120.97 | 128.5 (120.97–135.84)  |
| 83 | Malta                                  | 117.44 | 132.15 | 103.09 | 117.44 (103.09–132.15) |
| 84 | Iraq                                   | 198.36 | 255.89 | 150.4  | 198.36 (150.4–255.89)  |

|     |                                        |        |        |        |                        |
|-----|----------------------------------------|--------|--------|--------|------------------------|
| 85  | Morocco                                | 37.97  | 51.11  | 26.26  | 37.97 (26.26–51.11)    |
| 86  | Viet Nam                               | 96.91  | 129.69 | 72.06  | 96.91 (72.06–129.69)   |
| 87  | Taiwan<br>(Province of<br>China)       | 114.16 | 123.11 | 105.12 | 114.16 (105.12–123.11) |
| 88  | Jordan                                 | 173.84 | 228.09 | 125.65 | 173.84 (125.65–228.09) |
| 89  | Bosnia and<br>Herzegovina              | 103.69 | 130.05 | 76.82  | 103.69 (76.82–130.05)  |
| 90  | Micronesia<br>(Federated<br>States of) | 164.12 | 226.41 | 108.17 | 164.12 (108.17–226.41) |
| 91  | Malaysia                               | 170.54 | 204.89 | 139.92 | 170.54 (139.92–204.89) |
| 92  | Myanmar                                | 206.05 | 274.94 | 153.23 | 206.05 (153.23–274.94) |
| 93  | Samoa                                  | 171.84 | 236.76 | 130.77 | 171.84 (130.77–236.76) |
| 94  | Republic of<br>Korea                   | 81.98  | 99.63  | 53.19  | 81.98 (53.19–99.63)    |
| 95  | China                                  | 151.54 | 185.06 | 108.71 | 151.54 (108.71–185.06) |
| 96  | Republic of<br>Moldova                 | 99.7   | 114.32 | 87.87  | 99.7 (87.87–114.32)    |
| 97  | Palestine                              | 178.52 | 229.9  | 145.01 | 178.52 (145.01–229.9)  |
| 98  | France                                 | 125.11 | 135.56 | 114.44 | 125.11 (114.44–135.56) |
| 99  | Spain                                  | 108.28 | 116.3  | 99.82  | 108.28 (99.82–116.3)   |
| 100 | Saint Lucia                            | 131.75 | 159.21 | 108.56 | 131.75 (108.56–159.21) |
| 101 | Ukraine                                | 133.35 | 168.08 | 101.55 | 133.35 (101.55–168.08) |
| 102 | Guatemala                              | 186.28 | 217.3  | 160.05 | 186.28 (160.05–217.3)  |
| 103 | Greece                                 | 166.28 | 175.86 | 156.39 | 166.28 (156.39–175.86) |
| 104 | Switzerland                            | 100.66 | 110.76 | 91.02  | 100.66 (91.02–110.76)  |
| 105 | Bangladesh                             | 109.76 | 147.62 | 77.48  | 109.76 (77.48–147.62)  |
| 106 | Kyrgyzstan                             | 105.92 | 125.65 | 87.34  | 105.92 (87.34–125.65)  |
| 107 | Suriname                               | 137.56 | 174.21 | 102.71 | 137.56 (102.71–174.21) |
| 108 | Mexico                                 | 198.89 | 217.37 | 180.95 | 198.89 (180.95–217.37) |

|     |                                  |        |        |        |                        |
|-----|----------------------------------|--------|--------|--------|------------------------|
| 109 | North Macedonia                  | 123.32 | 157.34 | 86.35  | 123.32 (86.35–157.34)  |
| 110 | Gabon                            | 75.79  | 113.38 | 45.3   | 75.79 (45.3–113.38)    |
| 111 | Rwanda                           | 98.56  | 151.34 | 60.31  | 98.56 (60.31–151.34)   |
| 112 | Zimbabwe                         | 153.41 | 202.41 | 108.83 | 153.41 (108.83–202.41) |
| 113 | Tunisia                          | 89.6   | 121.73 | 62.89  | 89.6 (62.89–121.73)    |
| 114 | Liberia                          | 57.15  | 84.59  | 26.34  | 57.15 (26.34–84.59)    |
| 115 | Poland                           | 126.09 | 137.18 | 116.17 | 126.09 (116.17–137.18) |
| 116 | Austria                          | 110.59 | 119.04 | 101.87 | 110.59 (101.87–119.04) |
| 117 | Tajikistan                       | 125.78 | 193.72 | 80.82  | 125.78 (80.82–193.72)  |
| 118 | Luxembourg                       | 131.5  | 146.54 | 119.18 | 131.5 (119.18–146.54)  |
| 119 | United States<br>Virgin Islands  | 100.51 | 135.53 | 72.53  | 100.51 (72.53–135.53)  |
| 120 | Uruguay                          | 180.01 | 195.14 | 166.16 | 180.01 (166.16–195.14) |
| 121 | Peru                             | 184.76 | 244.32 | 116.19 | 184.76 (116.19–244.32) |
| 122 | Brazil                           | 136.6  | 142.97 | 129.79 | 136.6 (129.79–142.97)  |
| 123 | Sao Tome and Principe            | 26.94  | 42.04  | 16.83  | 26.94 (16.83–42.04)    |
| 124 | Eritrea                          | 111.52 | 159.26 | 68.45  | 111.52 (68.45–159.26)  |
| 125 | Zambia                           | 103.8  | 147.47 | 65.17  | 103.8 (65.17–147.47)   |
| 126 | Cabo Verde                       | 110.41 | 141.49 | 81.84  | 110.41 (81.84–141.49)  |
| 127 | Democratic Republic of the Congo | 71.26  | 104.27 | 44.49  | 71.26 (44.49–104.27)   |
| 128 | Sierra Leone                     | 58.49  | 84.42  | 28.03  | 58.49 (28.03–84.42)    |
| 129 | Congo                            | 79.27  | 111.05 | 50.57  | 79.27 (50.57–111.05)   |
| 130 | Malawi                           | 32.35  | 53.39  | 17.59  | 32.35 (17.59–53.39)    |
| 131 | Mongolia                         | 108.12 | 137.35 | 80.38  | 108.12 (80.38–137.35)  |
| 132 | American Samoa                   | 133.94 | 169.23 | 100.89 | 133.94 (100.89–169.23) |
| 133 | Mauritius                        | 114.75 | 120.33 | 107.23 | 114.75 (107.23–120.33) |
| 134 | Türkiye                          | 178.55 | 219.53 | 131.27 | 178.55 (131.27–219.53) |

|     |                      |        |        |        |                        |
|-----|----------------------|--------|--------|--------|------------------------|
| 135 | South Africa         | 110.18 | 126.48 | 82.09  | 110.18 (82.09–126.48)  |
| 136 | Guinea               | 19.52  | 32.68  | 10.53  | 19.52 (10.53–32.68)    |
| 137 | Namibia              | 80.61  | 114.99 | 55.23  | 80.61 (55.23–114.99)   |
| 138 | Palau                | 90.16  | 111.38 | 69.27  | 90.16 (69.27–111.38)   |
| 139 | Lebanon              | 147.71 | 189.82 | 116.57 | 147.71 (116.57–189.82) |
| 140 | Tuvalu               | 142.63 | 184    | 96.75  | 142.63 (96.75–184)     |
| 141 | Somalia              | 109.61 | 154.64 | 70.87  | 109.61 (70.87–154.64)  |
| 142 | Burundi              | 96.33  | 148.7  | 54.55  | 96.33 (54.55–148.7)    |
| 143 | Benin                | 58.69  | 84.1   | 28.27  | 58.69 (28.27–84.1)     |
| 144 | Qatar                | 110.56 | 149.68 | 76.68  | 110.56 (76.68–149.68)  |
| 145 | Afghanistan          | 373.66 | 553.13 | 215.7  | 373.66 (215.7–553.13)  |
| 146 | Bahrain              | 137.5  | 180.84 | 100.29 | 137.5 (100.29–180.84)  |
| 147 | Slovakia             | 132.4  | 170.41 | 95.17  | 132.4 (95.17–170.41)   |
| 148 | Brunei<br>Darussalam | 148.58 | 177.34 | 112.66 | 148.58 (112.66–177.34) |
| 149 | Denmark              | 130.57 | 141.57 | 120.77 | 130.57 (120.77–141.57) |
| 150 | Norway               | 101.59 | 106.82 | 95.7   | 101.59 (95.7–106.82)   |
| 151 | Haiti                | 260.85 | 396.25 | 158.21 | 260.85 (158.21–396.25) |
| 152 | Costa Rica           | 215.21 | 235.19 | 194.03 | 215.21 (194.03–235.19) |
| 153 | Kiribati             | 132.06 | 190.85 | 75.7   | 132.06 (75.7–190.85)   |
| 154 | Oman                 | 89.31  | 114.25 | 67.65  | 89.31 (67.65–114.25)   |
| 155 | Bahamas              | 128.38 | 160.47 | 102.63 | 128.38 (102.63–160.47) |
| 156 | Czechia              | 132.89 | 153.08 | 113.47 | 132.89 (113.47–153.08) |
| 157 | Bhutan               | 109.68 | 166.91 | 71.25  | 109.68 (71.25–166.91)  |
| 158 | Latvia               | 140.71 | 162.2  | 121.07 | 140.71 (121.07–162.2)  |
| 159 | Indonesia            | 182.22 | 232.04 | 146.79 | 182.22 (146.79–232.04) |
| 160 | Saudi Arabia         | 117.11 | 171.03 | 86.82  | 117.11 (86.82–171.03)  |
| 161 | Australia            | 121.72 | 130.54 | 113.34 | 121.72 (113.34–130.54) |
| 162 | Iceland              | 107.89 | 118.75 | 97.73  | 107.89 (97.73–118.75)  |
| 163 | Georgia              | 165.23 | 182.16 | 148.85 | 165.23 (148.85–182.16) |

|     |                                    |        |        |        |                        |
|-----|------------------------------------|--------|--------|--------|------------------------|
| 164 | United Kingdom                     | 112.34 | 116    | 107.58 | 112.34 (107.58–116)    |
| 165 | Nepal                              | 107.65 | 149.83 | 79.16  | 107.65 (79.16–149.83)  |
| 166 | Nicaragua                          | 137.89 | 168.47 | 96.32  | 137.89 (96.32–168.47)  |
| 167 | Israel                             | 132.65 | 142.35 | 123.13 | 132.65 (123.13–142.35) |
| 168 | Argentina                          | 153.09 | 165.64 | 143.18 | 153.09 (143.18–165.64) |
| 169 | Comoros                            | 104.04 | 148.9  | 68.7   | 104.04 (68.7–148.9)    |
| 170 | Romania                            | 128.38 | 144.82 | 111.25 | 128.38 (111.25–144.82) |
| 171 | Venezuela (Bolivarian Republic of) | 182.19 | 240.05 | 134.31 | 182.19 (134.31–240.05) |
| 172 | Kuwait                             | 83.85  | 101.13 | 69.26  | 83.85 (69.26–101.13)   |
| 173 | Dominican Republic                 | 133.35 | 172.73 | 99.41  | 133.35 (99.41–172.73)  |
| 174 | Yemen                              | 202.29 | 296.09 | 112.01 | 202.29 (112.01–296.09) |
| 175 | Trinidad and Tobago                | 150.95 | 191.98 | 118.94 | 150.95 (118.94–191.98) |
| 176 | Seychelles                         | 154.47 | 185.95 | 124.91 | 154.47 (124.91–185.95) |
| 177 | Solomon Islands                    | 163.93 | 222.14 | 100.04 | 163.93 (100.04–222.14) |
| 178 | Turkmenistan                       | 136.92 | 170.1  | 110.18 | 136.92 (110.18–170.1)  |
| 179 | Central African Republic           | 93.19  | 131.69 | 58.7   | 93.19 (58.7–131.69)    |
| 180 | United Republic of Tanzania        | 103.24 | 151.88 | 64.81  | 103.24 (64.81–151.88)  |
| 181 | Madagascar                         | 83.08  | 113.88 | 54.79  | 83.08 (54.79–113.88)   |
| 182 | Bolivia (Plurinational State of)   | 260.74 | 349.96 | 181.12 | 260.74 (181.12–349.96) |
| 183 | Burkina Faso                       | 61.22  | 85.05  | 29.43  | 61.22 (29.43–85.05)    |
| 184 | Vanuatu                            | 136.07 | 178.94 | 88.88  | 136.07 (88.88–178.94)  |
| 185 | Philippines                        | 176.64 | 207.7  | 144.88 | 176.64 (144.88–207.7)  |
| 186 | Niger                              | 52.94  | 84.51  | 24.21  | 52.94 (24.21–84.51)    |

|     |                                         |              |              |              |                        |
|-----|-----------------------------------------|--------------|--------------|--------------|------------------------|
| 187 | South Sudan                             | 124.51       | 172.74       | 82.26        | 124.51 (82.26–172.74)  |
| 188 | Nauru                                   | 203.41       | 297.91       | 132.56       | 203.41 (132.56–297.91) |
| 189 | Thailand                                | 186.32       | 241.88       | 115.21       | 186.32 (115.21–241.88) |
| 190 | Lesotho                                 | 147.36       | 199.28       | 105.32       | 147.36 (105.32–199.28) |
| 191 | Togo                                    | 55.01        | 80.04        | 25.79        | 55.01 (25.79–80.04)    |
| 192 | Gambia                                  | 24.09        | 33.45        | 16.07        | 24.09 (16.07–33.45)    |
| 193 | Northern Mariana Islands                | 116.46       | 139.17       | 87.83        | 116.46 (87.83–139.17)  |
| 194 | Saint Kitts and Nevis                   | 122.91       | 145.2        | 103.34       | 122.91 (103.34–145.2)  |
| 195 | Bermuda                                 | 109.7        | 132.33       | 91.47        | 109.7 (91.47–132.33)   |
| 196 | Tokelau                                 | 323.48       | 494.19       | 190.23       | 323.48 (190.23–494.19) |
| 197 | Greenland                               | 73.21        | 96.2         | 54.92        | 73.21 (54.92–96.2)     |
| 198 | Iran (Islamic Republic of)              | 176.34       | 205.76       | 116.43       | 176.34 (116.43–205.76) |
| 199 | Puerto Rico                             | 135.61       | 158.87       | 112.4        | 135.61 (112.4–158.87)  |
| 200 | Libya                                   | 229.86       | 309.04       | 168.23       | 229.86 (168.23–309.04) |
| 201 | United States of America                | 132.89       | 137.57       | 125.97       | 132.89 (125.97–137.57) |
| 202 | Sudan                                   | 226.2        | 323.49       | 136.95       | 226.2 (136.95–323.49)  |
| 203 | Barbados                                | 163.64       | 205.71       | 127.3        | 163.64 (127.3–205.71)  |
| 204 | Cuba                                    | 129.84       | 147.66       | 113.33       | 129.84 (113.33–147.66) |
|     | The average age-standardized DALYs rate | 130.887 0588 | 166.876 6667 | 98.7976 9608 | 130.89 (98.80–166.88)  |

---
